# Supplementary material
Source: PubMed Central journal article supplement (PMC518849)
Supplement: pnas_101_38_13891__1.pdf [file pnas_101_38_13891__1.pdf]

**Table 1. Transcripts enriched in CA neurons**

| Gene name                                           | Genebank Accession | RATIO SN | RATIO VTA | RATIO A13 | RATIO LC | Mean signal SN | Mean signal VTA | Mean signal A13 | Mean signal LC |
|-----------------------------------------------------|--------------------|----------|-----------|-----------|----------|----------------|-----------------|-----------------|----------------|
| Tyrosine hydroxylase                                | M10244             | 283      | 277       | 150       | 202      | 20,496         | 32,289          | 37,182          | 30,018         |
| Vesicular monoamine transporter 2                   | A46374             | 249      | 210       | 68        | 177      | 37,401         | 48,389          | 47,620          | 44,041         |
| Dopa decarboxylase                                  | M27716             | 77       | 69        | 41        | 28       | 49,286         | 55,040          | 58,930          | 47,115         |
| GTP cyclohydrolase I                                | A39080             | 36       | 71        | 27        | 69       | 11,091         | 23,641          | 16,913          | 28,805         |
| Collagen type II                                    | L48440             | 25       | 13        | 11        | 28       | 4,268          | 2,862           | 3,745           | 7,964          |
| Peripherin                                          | AF031878           | 12       | 10        | 17        | 33       | 1,837          | 2,430           | 4,459           | 4,449          |
| Hypothetical protein LOC313453                      | AY327410           | 25       | 29        | 6         | 11       | 25,935         | 40,122          | 28,998          | 32,930         |
| Glutathione peroxidase                              | D00680             | 5        | 7         | 16        | 41       | 4,072          | 7,262           | 17,621          | 22,780         |
| Pterin-4- $\alpha$ -carbinolamine dehydratase       | AJ005542           | 7        | 10        | 14        | 17       | 11,647         | 17,660          | 31,593          | 31,708         |
| Decay-accelerating factor                           | AB032395           | 13       | 14        | 9         | 9        | 6,786          | 6,300           | 6,491           | 6,771          |
| MHC I [RT1.A3(O) $\alpha$ chain]                    | X90374             | 14       | 12        | 9         | 9        | 1,660          | 1,654           | 1,735           | 2,026          |
| Polysialyltransferase 1                             | X83562             | 5        | 8         | 20        | 8        | 865            | 1,326           | 3,693           | 2,049          |
| EST                                                 | BQ781749           | 10       | 10        | 8         | 9        | 5,592          | 7,065           | 8,361           | 9,450          |
| EST                                                 | BM391695           | 14       | 8         | 7         | 6        | 2,324          | 2,071           | 2,870           | 2,063          |
| Cell growth regulator 11                            | U66470             | 10       | 7         | 5         | 11       | 14,481         | 14,295          | 16,186          | 24,955         |
| EST similar to vesicular membrane protein           | BE115561           | 7        | 9         | 9         | 7        | 10,392         | 13,920          | 20,621          | 16,822         |
| Argininosuccinate synthetase                        | BC063146           | 5        | 7         | 9         | 10       | 2,407          | 3,776           | 6,214           | 5,336          |
| EST similar to erythrocyte protein band 4.1-like 4b | AI175220           | 5        | 8         | 6         | 12       | 1,033          | 1,612           | 1,886           | 3,596          |
| Dopamine receptor interacting protein calcyon       | AF303658           | 6        | 8         | 7         | 8        | 15,475         | 22,949          | 29,626          | 26,852         |
| 2,3-oxidosqualene:lanosterol cyclase                | D45252             | 10       | 7         | 4         | 8        | 7,213          | 6,940           | 7,017           | 10,912         |
| EST similar to LOC298366                            | XM_216483          | 7        | 7         | 10        | 6        | 2,161          | 2,624           | 4,915           | 3,809          |
| EST                                                 | BE107813           | 6        | 4         | 9         | 9        | 689            | 732             | 1,300           | 1,175          |
| Thymosin $\beta$ -10                                | M58404             | 8        | 7         | 5         | 8        | 12,767         | 14,819          | 18,510          | 21,313         |
| Arginine methyltransferase (PRMT2)                  | AF169620           | 6        | 6         | 7         | 8        | 7,366          | 9,795           | 14,601          | 13,730         |
| Apoptosis repressor with CARD domain                | U40627             | 6        | 6         | 5         | 9        | 3,139          | 3,778           | 4,548           | 7,197          |
| EST similar to mKIAA1402 protein (LOC296733)        | CB325657           | 8        | 5         | 5         | 8        | 3,842          | 3,580           | 5,016           | 7,011          |
| EST similar to tumor antigen se20-4 (LOC302612)     | XM_217607          | 5        | 7         | 7         | 7        | 10,188         | 14,690          | 21,478          | 17,457         |
| Intracellular chloride channel CLIC3                | XM_238312          | 5        | 7         | 6         | 5        | 883            | 1,105           | 1,441           | 1,236          |
| Phosphofructokinase 1                               | X58865             | 7        | 5         | 5         | 7        | 1,945          | 1,816           | 2,600           | 3,118          |
| Similar to RIKEN cDNA 2310037B18 (LOC304323)        | XM_221949          | 6        | 5         | 5         | 6        | 951            | 1,054           | 1,412           | 1,619          |
| EST similar to LOC361521                            | XM_341806          | 6        | 5         | 6         | 5        | 4,678          | 5,600           | 8,404           | 8,148          |
| EST similar to WD repeat protein (LOC305349)        | XM_223412          | 6        | 7         | 4         | 5        | 2,407          | 3,939           | 4,100           | 3,637          |
| 150 kDa oxygen-regulated protein                    | U41853             | 5        | 6         | 6         | 5        | 4,561          | 6,060           | 8,111           | 6,970          |
| EST                                                 | BG665699           | 5        | 6         | 5         | 5        | 6,059          | 7,419           | 9,946           | 9,687          |
| Protein phosphatase 4                               | XM_341929          | 5        | 4         | 5         | 7        | 1,702          | 1,764           | 2,611           | 3,530          |
| Neural cell adhesion molecule                       | X06564             | 5        | 5         | 6         | 5        | 5,295          | 8,315           | 13,024          | 9,498          |
| EST                                                 | BE120180           | 5        | 5         | 5         | 4        | 4,291          | 5,967           | 7,314           | 6,833          |

Genes with significant measurements across replicates were selected by one-class SAM (false-discovery rate, <1%). Transcripts that are >4-fold enriched over whole brain in all cell groups are listed. Abbreviations: CA, catecholaminergic; LC, locus coeruleus; SN, substantia nigra; VTA, ventral tegmental area.
