# Supplementary material
Source: PubMed Central journal article supplement (PMC518849)
Supplement: pnas_101_38_13891__2.pdf [file pnas_101_38_13891__2.pdf]

**Table 2. Transcripts with differential expression between subgroups of CA neurons**

| Gene name                                                                                                                                                                                 | Genebank Accession | RATIO SN | RATIO VTA | RATIO A13 | RATIO LC | Mean signal SN | Mean signal VTA | Mean signal A13 | Mean signal LC |
|-------------------------------------------------------------------------------------------------------------------------------------------------------------------------------------------|--------------------|----------|-----------|-----------|----------|----------------|-----------------|-----------------|----------------|
| Incyte EST                                                                                                                                                                                | N.A.               | 2.3      | 3.4       | 0.5       | 4.2      | 665            | 804             | 527             | 1,367          |
| Mouse bone morphogenetic protein 2 (BMP-2) gene, complete cds                                                                                                                             | L25602             | 1.2      | 3.8       | 0.2       | 1.5      | 1,358          | 3,393           | 743             | 2,520          |
| Wnt2: wingless-type MMTV integration site 2                                                                                                                                               | AK045120           | 2.5      | 9.3       | 0.1       | 1.6      | 2,644          | 7,864           | 682             | 3,536          |
| Mouse mRNA for distal intestinal serine protease (DISP gene)                                                                                                                              | AJ243866           | 1.4      | 4.4       | 0.8       | 2.0      | 501            | 655             | 587             | 685            |
| Incyte EST                                                                                                                                                                                | N.A.               | 5.0      | 2.9       | 0.4       | 0.6      | 747            | 636             | 540             | 567            |
| Incyte EST                                                                                                                                                                                | N.A.               | 4.3      | 1.8       | 0.3       | 1.0      | 3,349          | 1,999           | 926             | 1,867          |
| Incyte EST                                                                                                                                                                                | N.A.               | 6.2      | 1.5       | 0.4       | 1.6      | 1,086          | 654             | 555             | 844            |
| Rattus norvegicus cDNA clone UI-R-CX0-bwx-e-02-0-UI 3'                                                                                                                                    | BI278837           | 5.3      | 2.4       | 3.5       | 0.9      | 1,956          | 1,124           | 2,139           | 913            |
| Rat RET ligand 1 (RETL1) mRNA, complete cds                                                                                                                                               | U97142             | 27.6     | 29.9      | 34.0      | 2.2      | 5,374          | 7,981           | 12,235          | 2,675          |
| Rattus norvegicus cDNA clone UI-R-A0-bc-f-03-0-UI 3'                                                                                                                                      | AA818585           | 1.3      | 2.8       | 4.3       | 0.5      | 1,105          | 2,103           | 3,971           | 1,087          |
| Rat mRNA for very-long-chain acyl-CoA synthetase, complete cds                                                                                                                            | D85100             | 1.7      | 3.3       | 4.7       | 0.4      | 1,599          | 2,830           | 5,400           | 1,151          |
| Rattus norvegicus putative fatty acid desaturase (Fads3)                                                                                                                                  | XM_215140          | 4.5      | 4.7       | 6.1       | 0.5      | 1,114          | 1,169           | 1,950           | 647            |
| RIKEN full-length enriched, adult male corpora quadrigemina Mus musculus cDNA clone B230214B19 3', MRNA sequence (similar to GPR 39 (G protein-coupled neurotensin receptor)              | BB307345           | 3.6      | 4.5       | 7.4       | 0.5      | 14,734         | 19,224          | 34,804          | 6,189          |
| SODIUM CHANNEL, VOLTAGE-GATED, TYPE 6, $\alpha$ (SCN6A)                                                                                                                                   | Y09164             | 2.6      | 3.5       | 3.3       | 0.7      | 1,271          | 1,993           | 2,635           | 1,026          |
| Rat mRNA for metastasis-associated GPI-anchored protein                                                                                                                                   | AJ001043           | 1.1      | 2.8       | 4.2       | 0.7      | 564            | 916             | 1,510           | 712            |
| Rattus norvegicus cDNA clone UI-R-CA1-bjt-g-12-0-UI 3'                                                                                                                                    | BF410127           | 1.3      | 2.4       | 5.5       | 0.8      | 1,222          | 2,241           | 6,196           | 1,510          |
| Rat mRNA for Castration Induced Prostatic Apoptosis Related protein-1 (CIPAR-1)                                                                                                           | AJ010750           | 1.0      | 5.0       | 7.4       | 1.2      | 1,165          | 5,322           | 11,583          | 2,261          |
| Rat DRG Library Rattus norvegicus cDNA clone DRNBLF02 5'                                                                                                                                  | BG671101           | 1.2      | 5.3       | 11.0      | 1.8      | 6,359          | 21,966          | 42,331          | 15,662         |
| Rattus norvegicus cDNA clone UI-R-FJ0-cpx-m-14-0-UI 3' Similar to hypothetical protein FLJ12505                                                                                           | CA504848           | 2.2      | 5.3       | 8.1       | 1.9      | 1,161          | 2,246           | 4,709           | 1,548          |
| Mouse ODZ2 (Odz2) mRNA, partial cds                                                                                                                                                       | AF195419           | 1.6      | 2.1       | 5.5       | 1.1      | 3,482          | 5,198           | 14,772          | 4,528          |
| Rattus norvegicus cDNA clone UI-R-CX0-bxm-h-07-0-UI 3' moderately similar to Tnf receptor-associated factor 3 (Traf3) gene, partial sequence; and amnionless precursor protein (Amn) gene | BI276908           | 4.4      | 4.5       | 25.2      | 0.8      | 762            | 769             | 2,837           | 584            |
| vitelliform macular dystrophy protein                                                                                                                                                     | AAC64926           | 2.2      | 2.2       | 3.8       | 0.4      | 619            | 655             | 988             | 545            |

|                                                                                                        |           |      |      |     |     |        |        |        |        |
|--------------------------------------------------------------------------------------------------------|-----------|------|------|-----|-----|--------|--------|--------|--------|
| Mouse mimp3 mRNA for igf2 mRNA-binding protein 3, complete cds                                         | AB046173  | 3.0  | 4.4  | 1.5 | 0.6 | 780    | 1,240  | 903    | 649    |
| ESTs Highly similar to insulin-like growth factor 2, binding protein 3                                 | CA503752  | 2.8  | 4.0  | 1.4 | 0.5 | 854    | 1,119  | 857    | 620    |
| Mouse untranslated RNA G90                                                                             | AJ132433  | 5.3  | 7.3  | 2.5 | 0.2 | 1,406  | 1,935  | 1,171  | 551    |
| Rat mRNA for keratin 18                                                                                | X81448    | 7.1  | 14.9 | 3.9 | 0.1 | 3,367  | 6,763  | 3,703  | 629    |
| Rat nicotinic acetylcholine receptor $\alpha$ 4 subunit mRNA, complete cds                             | L31620    | 9.3  | 9.6  | 2.8 | 0.3 | 10,481 | 13,978 | 8,000  | 1,213  |
| tyrosine phosphatase receptor Ftp-1                                                                    | D88187    | 10.7 | 8.2  | 3.6 | 0.2 | 7,056  | 7,401  | 6,181  | 925    |
| Rat gene for glycogen phosphorylase (liver type)                                                       | X63515    | 2.5  | 4.8  | 1.7 | 0.5 | 2,482  | 4,469  | 2,688  | 1,282  |
| Rat protein kinase C-binding protein NELL1 mRNA, complete cds                                          | U48246    | 3.5  | 4.5  | 1.8 | 0.1 | 12,002 | 17,438 | 14,120 | 1,785  |
| Rat protein kinase C-binding protein NELL1 mRNA, complete cds                                          | U48246    | 3.2  | 4.4  | 1.9 | 0.1 | 13,017 | 18,428 | 15,404 | 1,319  |
| INCYTE EST                                                                                             | N.A.      | 2.7  | 3.0  | 2.9 | 0.2 | 2,085  | 2,597  | 3,550  | 727    |
| Rattus norvegicus LOC302889 (LOC302889), mRNA                                                          | XM_239146 | 1.7  | 2.5  | 2.2 | 0.2 | 1,271  | 2,133  | 2,724  | 696    |
| Mus musculus similar to phosphoinositol 3-phosphate-binding protein-3 [Homo sapiens] (LOC233765), mRNA | XM_133864 | 2.4  | 2.8  | 3.5 | 0.1 | 4,136  | 5,817  | 10,814 | 711    |
| Mus musculus similar to phosphoinositol 3-phosphate-binding protein-3 [Homo sapiens] (LOC233765), mRNA | XM_133864 | 2.4  | 2.8  | 3.6 | 0.1 | 2,749  | 3,647  | 6,933  | 610    |
| Rattus norvegicus cDNA clone UI-R-C0-gx-g-08-0-UI 3'                                                   | AA964745  | 6.6  | 2.5  | 0.9 | 0.8 | 2,687  | 1,759  | 1,087  | 1,130  |
| Rattus norvegicus cDNA clone UI-R-BJ0p-afu-e-03-0-UI 3'                                                | AW435438  | 4.3  | 2.9  | 0.9 | 0.7 | 881    | 618    | 602    | 575    |
| Rat serine protease RNK-Met-1 mRNA, complete cds                                                       | L05175    | 1.8  | 4.7  | 0.8 | 0.6 | 3,220  | 8,632  | 3,201  | 2,314  |
| Mouse PDZ domain actin binding protein Shroom mRNA, complete cds                                       | AF199421  | 2.6  | 4.4  | 0.4 | 0.9 | 1,394  | 2,849  | 904    | 1,115  |
| Mouse zfh-4 mRNA for zinc-finger homeodomain protein 4, complete cds                                   | AB024499  | 4.3  | 4.9  | 0.4 | 0.9 | 3,929  | 5,617  | 1,322  | 2,260  |
| Rat aldehyde dehydrogenase mRNA, complete cds                                                          | M23995    | 6.4  | 16.7 | 0.7 | 1.0 | 991    | 2,088  | 588    | 651    |
| Rat aldehyde dehydrogenase mRNA, complete cds                                                          | M23995    | 11.3 | 22.5 | 0.4 | 0.9 | 1,871  | 4,772  | 641    | 768    |
| Rat aldehyde dehydrogenase (ALDH) mRNA, complete cds                                                   | AF001896  | 23.3 | 32.1 | 0.3 | 1.5 | 47,053 | 51,917 | 5,431  | 18,460 |
| INCYTE EST                                                                                             | N.A.      | 3.3  | 3.7  | 0.8 | 0.9 | 2,730  | 3,130  | 1,431  | 1,872  |
| Mouse dihydrofolate reductase gene, 3' flank, segment 2                                                | M18215    | 5.3  | 6.0  | 1.0 | 0.9 | 951    | 974    | 672    | 666    |
| Mouse lysyl hydroxylase isoform 2 mRNA, complete cds                                                   | AF080572  | 4.4  | 19.1 | 0.8 | 1.9 | 3,358  | 12,871 | 1,388  | 2,631  |
| KIAA1568 protein (ROBO2)                                                                               | BAB13394  | 4.0  | 3.6  | 1.1 | 0.4 | 967    | 1,027  | 723    | 609    |
| Mouse NAD(+)-dependent 15-hydroxyprostaglandin dehydrogenase mRNA, complete cds                        | U44389    | 8.7  | 7.8  | 0.5 | 0.3 | 1,556  | 1,573  | 583    | 532    |

|                                                                                                                                                  |           |      |      |     |      |        |        |        |        |
|--------------------------------------------------------------------------------------------------------------------------------------------------|-----------|------|------|-----|------|--------|--------|--------|--------|
| Tumor-associated calcium signal transducer 1                                                                                                     | AJ001044  | 9.2  | 5.1  | 0.7 | 0.3  | 2,329  | 1,528  | 795    | 581    |
| Ca <sup>2+</sup> dependent activator protein for secretion                                                                                       | BC023929  | 10.5 | 9.7  | 0.8 | 0.2  | 1,009  | 1,020  | 579    | 526    |
| Rattus norvegicus cDNA clone UI-R-C2p-oc-a-05-0-UI 5'                                                                                            | BF551935  | 8.2  | 5.9  | 0.5 | 0.4  | 18,248 | 19,327 | 3,470  | 2,926  |
| Mouse retinal short-chain dehydrogenase/reductase 1 (Rsdr1) gene, exon 1                                                                         | AF179238  | 5.6  | 10.5 | 0.4 | 0.4  | 7,426  | 11,271 | 2,182  | 1,845  |
| Mouse mRNA for caspase-7                                                                                                                         | Y13088    | 11.5 | 10.3 | 0.7 | 0.5  | 8,701  | 8,490  | 1,271  | 1,397  |
| INCYTE EST                                                                                                                                       | N.A.      | 3.8  | 4.7  | 0.8 | 0.8  | 8,150  | 11,214 | 4,082  | 4,133  |
| Rattus norvegicus cDNA clone UI-R-DK0-cej-b-12-0-UI 3'                                                                                           | BI294080  | 8.3  | 6.0  | 0.8 | 0.6  | 11,790 | 11,101 | 3,022  | 2,704  |
| Rat mRNA for protein kinase PASK, complete cds                                                                                                   | D88190    | 4.0  | 4.4  | 1.1 | 0.5  | 9,557  | 12,989 | 7,076  | 3,237  |
| Rat mRNA for protein kinase PASK, complete cds                                                                                                   | D88190    | 4.1  | 4.5  | 1.2 | 0.5  | 16,258 | 21,652 | 12,319 | 6,254  |
| Mouse encephalopsin mRNA, complete cds                                                                                                           | AF140241  | 5.8  | 8.3  | 1.1 | 0.7  | 6,594  | 10,319 | 3,157  | 2,303  |
| Mouse laminin $\beta$ 3 (Lamb3) chain mRNA, complete cds                                                                                         | U43298    | 12.3 | 22.3 | 1.4 | 0.2  | 3,991  | 7,023  | 1,361  | 609    |
| Rattus norvegicus cDNA clone UI-R-BT1-bnq-f-02-0-UI 3'                                                                                           | BF412664  | 5.2  | 2.8  | 0.5 | 0.9  | 4,287  | 3,516  | 1,388  | 2,131  |
| Mus musculus glucan (1,4- $\alpha$ -), branching enzyme 1 (Gbe1)                                                                                 | NM_028803 | 4.5  | 3.6  | 0.8 | 1.2  | 9,931  | 11,374 | 4,967  | 6,422  |
| UI-R-BJ0-aec-c-12-0-UIs1 UI-R-BJ0 Rattus norvegicus cDNA clone UI-R-BJ0-aec-c-12-0-UI 3'                                                         | AW253868  | 6.5  | 4.0  | 0.6 | 3.6  | 1,738  | 1,206  | 683    | 1,811  |
| Rattus norvegicus glycoprotein hormone $\alpha$ 2 (Gpha2), mRNA                                                                                  | NM_133619 | 8.0  | 5.6  | 0.4 | 2.2  | 1,952  | 1,582  | 617    | 1,338  |
| Incyte EST                                                                                                                                       | N.A.      | 5.4  | 2.5  | 0.9 | 1.9  | 6,482  | 5,195  | 3,894  | 5,329  |
| Mus musculus adult male olfactory brain cDNA, RIKEN full-length enriched library, clone:6430550H21 product:HYPOTHETICAL 38.5 KDA PROTEIN homolog | AK078264  | 24.5 | 29.3 | 6.5 | 11.3 | 25,935 | 40,122 | 28,998 | 32,930 |
| Mouse Dp111 mRNA for polyposis locus protein 1-like 1 (TB2 protein-like 1), complete cds                                                         | AB039933  | 10.5 | 4.1  | 1.8 | 1.3  | 9,379  | 5,276  | 4,141  | 3,715  |
| Mouse chromosome 17 clone GS-384N12, complete sequence                                                                                           | AC087217  | 11.8 | 6.9  | 1.6 | 2.3  | 787    | 775    | 608    | 715    |
| Rat glutamate receptor interacting protein 2 mRNA, complete cds                                                                                  | AF205193  | 9.3  | 7.8  | 2.2 | 2.4  | 2,768  | 2,871  | 1,646  | 1,944  |
| UI-R-C3-td-e-06-0-UI.s1 UI-R-C3 Rattus norvegicus cDNA clone UI-R-C3-td-e-06-0-UI 3'                                                             | AI548358  | 7.4  | 5.6  | 1.3 | 2.0  | 1,947  | 1,690  | 873    | 1,268  |
| Rattus norvegicus cDNA clone UI-R-A0-bh-h-03-0-UI 3' similar H.sapiens mRNA for IL13 receptor $\alpha$ -1 chain                                  | AA819589  | 10.6 | 8.8  | 1.5 | 4.9  | 7,476  | 9,836  | 4,020  | 12,477 |
| Rattus norvegicus cDNA clone UI-R-DK0-cez-g-04-0-UI 3' Weakly similar to Notch 3 [Rattus norvegicus]                                             | BI296384  | 24.8 | 16.1 | 1.3 | 5.5  | 2,986  | 3,254  | 864    | 2,139  |
| Rat interferon-inducible protein 16 mRNA, complete cds                                                                                           | AF164040  | 5.8  | 6.7  | 1.6 | 2.9  | 3,038  | 4,616  | 2,003  | 3,250  |

|                                                                                                                                                                       |           |      |      |     |     |        |        |        |        |
|-----------------------------------------------------------------------------------------------------------------------------------------------------------------------|-----------|------|------|-----|-----|--------|--------|--------|--------|
| Mouse cyclin ania-6b gene, partial sequence                                                                                                                           | AF185591  | 18.0 | 13.9 | 2.6 | 6.5 | 1,742  | 2,106  | 1,081  | 1,612  |
| Incyte EST no homology                                                                                                                                                | N.A.      | 8.1  | 7.9  | 1.1 | 4.0 | 3,481  | 3,819  | 1,203  | 3,087  |
| Mouse fibroblast growth factor 1 gene, exon 3, complete sequence; and partial cds                                                                                     | AF067190  | 28.0 | 11.2 | 0.8 | 4.9 | 9,078  | 6,370  | 1,367  | 5,275  |
| Mouse DHFR gene, exon 3                                                                                                                                               | V00737    | 8.7  | 16.7 | 1.5 | 2.7 | 1,835  | 3,122  | 928    | 1,248  |
| Rattus norvegicus cDNA clone UI-R-E1-fd-f-03-0-UI 5'. Similar to RNA binding motif, single stranded interacting protein 3; RNA-binding protein [Homo sapiens]         | BF561068  | 10.0 | 9.8  | 0.8 | 3.2 | 24,938 | 30,883 | 6,549  | 21,348 |
| Mouse p53 apoptosis-associated target (Perp) mRNA, complete cds                                                                                                       | AF249870  | 13.1 | 9.4  | 0.7 | 4.5 | 21,416 | 26,560 | 4,977  | 18,723 |
| Rat p65 mRNA                                                                                                                                                          | X52772    | 5.2  | 4.4  | 1.0 | 2.4 | 9,360  | 12,908 | 7,808  | 11,374 |
| Mus musculus RIKEN cDNA 1300007F04 gene (1300007F04Rik), mRNA                                                                                                         | XM_126132 | 6.2  | 5.4  | 1.0 | 1.7 | 790    | 902    | 598    | 685    |
| Rattus norvegicus glutathione peroxidase 2 (Gpx2), mRNA                                                                                                               | NM_183403 | 51.0 | 13.3 | 1.3 | 2.8 | 3,589  | 1,892  | 721    | 963    |
| Mouse capping protein $\alpha$ 1 subunit mRNA, partial cds                                                                                                            | U16740    | 4.4  | 4.7  | 2.6 | 1.0 | 4,429  | 6,066  | 6,594  | 2,713  |
| UI-R-DO1-cms-k-22-0-UI.s1 UI-R-DO1 Rattus norvegicus cDNA clone UI-R-DO1-cms-k-22-0-UI 3'                                                                             | BQ202872  | 3.9  | 4.8  | 2.0 | 0.8 | 6,929  | 8,894  | 6,260  | 3,161  |
| INCYTE EST                                                                                                                                                            | N.A.      | 5.0  | 6.1  | 1.8 | 0.6 | 5,286  | 8,805  | 4,462  | 1,787  |
| AMGNNUC:NRHY5-00457-A9-A W Rat hypothalamus (10471) Rattus norvegicus cDNA clone nrhy5-00457-a9 5'                                                                    | CB695344  | 9.4  | 8.9  | 3.4 | 0.5 | 10,579 | 14,178 | 10,797 | 2,360  |
| UI-R-DK0-cfw-b-04-0-UI.s1 UI-R-DK0 Rattus norvegicus cDNA clone UI-R-DK0-cfw-b-04-0-UI 3'. Similar to Solute carrier family 21 (organic anion transporter), member 12 | BI290422  | 5.7  | 6.9  | 2.1 | 1.0 | 5,192  | 6,981  | 4,038  | 2,096  |
| UI-R-CN0-bkw-d-11-0-UI.s1 UI-R-CN0 Rattus norvegicus cDNA clone UI-R-CN0-bkw-d-11-0-UI 3'                                                                             | BF416987  | 5.7  | 5.4  | 3.0 | 1.2 | 8,094  | 10,867 | 10,818 | 5,923  |
| Mouse transcription factor PBX1b (PBX1b) mRNA, complete cds                                                                                                           | AF020197  | 6.6  | 6.7  | 3.1 | 1.8 | 3,082  | 3,982  | 2,906  | 1,859  |
| Mouse transcription factor PBX1b (PBX1b) mRNA, complete cds                                                                                                           | AF020197  | 6.6  | 6.9  | 3.0 | 1.6 | 2,684  | 3,841  | 2,803  | 1,631  |
| Rattus norvegicus cDNA clone UI-R-CY0-bxq-f-10-0-UI 3'                                                                                                                | BI277484  | 9.9  | 8.2  | 2.3 | 1.5 | 32,145 | 32,596 | 21,534 | 14,579 |
| Rattus norvegicus cDNA clone UI-R-A1-do-b-05-0-UI 3'                                                                                                                  | AA901088  | 19.9 | 19.2 | 4.4 | 2.6 | 4,602  | 7,171  | 3,176  | 1,565  |
| Mouse mRNA for AT motif-binding factor (ATBF1), complete cds                                                                                                          | D26046    | 8.5  | 4.9  | 1.8 | 1.5 | 1,552  | 1,429  | 1,066  | 916    |
| UI-R-CN0-bmi-a-11-0-UI.s1 UI-R-CN0 Rattus norvegicus cDNA clone UI-R-CN0-bmi-a-11-0-UI 3'. Length = 458                                                               | BF410961  | 3.1  | 5.1  | 0.9 | 1.0 | 896    | 976    | 668    | 674    |
| Rat core protein (HSPG) mRNA, complete cds. =syndecan 2                                                                                                               | M81687    | 3.4  | 8.8  | 2.0 | 1.7 | 2,213  | 5,022  | 2,250  | 2,244  |

|                                                                                                                                                                      |          |       |       |     |     |        |        |        |        |
|----------------------------------------------------------------------------------------------------------------------------------------------------------------------|----------|-------|-------|-----|-----|--------|--------|--------|--------|
| Mouse NMRI fibroglycan (syndecan-2) gene, complete cds                                                                                                               | U00674   | 3.1   | 8.7   | 1.9 | 1.5 | 14,836 | 33,370 | 17,834 | 16,066 |
| dJ688G8.3 (Similar to chelonianin (basic protease inhibitor))                                                                                                        | CAC18560 | 7.2   | 17.4  | 2.6 | 1.6 | 2,396  | 4,579  | 1,526  | 1,270  |
| UI-R-BS0-anu-b-09-0-UI.s1 UI-R-BS0 Rattus norvegicus cDNA clone UI-R-BS0-anu-b-09-0-UI 3'. Length = 238 similar to deleted in colorectal cancer (DCC)                | AW534258 | 6.1   | 10.4  | 1.7 | 1.2 | 11,014 | 17,410 | 5,314  | 4,596  |
| unnamed protein product                                                                                                                                              | BAA91341 | 9.5   | 19.8  | 2.4 | 0.9 | 2,277  | 5,323  | 1,762  | 917    |
| Rat proline- and glutamine-rich protein mRNA, complete cds                                                                                                           | AF192802 | 3.3   | 4.7   | 0.9 | 1.6 | 6,310  | 10,161 | 3,984  | 6,498  |
| Rattus norvegicus cDNA clone UI-R-DN0-civ-h-20-0-UI 3' similar to Gcnt2 Glucosaminyltransferase, I-branching enzyme                                                  | BI292435 | 7.2   | 8.0   | 0.9 | 2.0 | 4,094  | 5,081  | 1,312  | 2,803  |
| Rat mRNA for tissue factor pathway inhibitor precursor, complete cds                                                                                                 | D10926   | 3.8   | 5.1   | 1.3 | 1.4 | 2,364  | 4,164  | 2,427  | 2,114  |
| UI-R-CT0-buh-g-12-0-UI.s1 UI-R-CT0 Rattus norvegicus cDNA clone UI-R-CT0-buh-g-12-0-UI 3'                                                                            | BG381237 | 4.8   | 7.1   | 1.3 | 1.2 | 656    | 818    | 582    | 586    |
| Rat Robo2 mRNA, partial cds                                                                                                                                          | AF182037 | 4.5   | 4.4   | 1.0 | 1.2 | 1,321  | 1,655  | 1,060  | 1,138  |
| bA524D16A.1 (sushi-repeat-containing protein)                                                                                                                        | CAC16060 | 12.5  | 37.1  | 1.2 | 1.3 | 1,879  | 5,096  | 723    | 734    |
| Rattus norvegicus cDNA clone UI-R-EA0-ckx-k-09-0-UI 3' similar to solute carrier family 39 (zinc transporter), member 4 [Homo sapiens] and Catecholamines up protein | BQ196656 | 103.6 | 265.6 | 1.6 | 1.4 | 13,954 | 31,245 | 1,208  | 1,017  |
| Rat G-protein coupled thrombin receptor (PAR-1) mRNA, complete cds                                                                                                   | M81642   | 8.4   | 15.7  | 1.5 | 1.7 | 7,945  | 15,615 | 3,106  | 4,560  |
| UI-R-CA0-bhh-d-12-0-UI.s1 UI-R-CA0 Rattus norvegicus cDNA clone UI-R-CA0-bhh-d-12-0-UI 3'                                                                            | BF402822 | 3.0   | 3.8   | 1.0 | 1.4 | 8,035  | 11,454 | 6,291  | 6,017  |
| Mouse strain C3H/HeN mRNA preferentially expressed in LPS-normoresponsive macrophages. =NM_134392.1  Rattus norvegicus kinesin-related protein HASH (Hash), mRNA     | AF032967 | 4.6   | 6.4   | 1.1 | 1.5 | 2,233  | 2,239  | 1,060  | 1,299  |
| Mouse Down syndrome candidate region 1-like protein 1 (Dscr1l1) mRNA, complete cds. =calcineurin inhibitory protein ZAKI-4                                           | AF237887 | 11.9  | 8.7   | 1.6 | 1.4 | 24,731 | 27,005 | 11,086 | 7,047  |
| UI-R-DZ0-ckm-e-18-0-UI.s1 UI-R-DZ0 Rattus norvegicus cDNA clone UI-R-DZ0-ckm-e-18-0-UI 3'                                                                            | BM388540 | 6.5   | 5.1   | 1.2 | 1.0 | 8,936  | 11,261 | 5,565  | 4,157  |
| Rattus norvegicus cDNA clone UI-R-CN1-cly-a-20-0-UI 3'.                                                                                                              | BQ194193 | 8.5   | 7.6   | 1.4 | 1.0 | 11,532 | 16,708 | 7,405  | 4,560  |
| Mouse mRNA for PMP24 protein.                                                                                                                                        | AJ271476 | 7.8   | 6.3   | 2.1 | 1.7 | 4,496  | 4,408  | 2,765  | 2,436  |

|                                                                                                           |           |      |      |     |      |        |        |        |        |
|-----------------------------------------------------------------------------------------------------------|-----------|------|------|-----|------|--------|--------|--------|--------|
| Mus musculus mRNA for calcineurin inhibitory protein ZAKI-4 $\beta$ , complete cds                        | AB061525  | 5.3  | 3.1  | 1.0 | 1.1  | 25,226 | 24,795 | 16,394 | 13,086 |
| Prepro-Neuropeptide W polypeptide                                                                         | NM_153294 | 4.1  | 8.2  | 1.4 | 1.6  | 646    | 1,016  | 587    | 613    |
| Mouse chromosome 16 clone ct7-581i11 strain 129/Sv ES cell line CJ7, complete sequence                    | AC005817  | 5.1  | 4.5  | 0.9 | 1.8  | 911    | 954    | 695    | 944    |
| Rat phospholipase C $\gamma$ -2, complete cds                                                             | J05155    | 1.2  | 8.5  | 1.0 | 0.4  | 1,530  | 7,388  | 2,018  | 968    |
| Rat kidney extracellular calcium-sensing receptor mRNA, complete cds                                      | U10354    | 0.9  | 16.8 | 0.9 | 0.2  | 597    | 2,851  | 794    | 533    |
| Rat follistatin gene, exon 6, clones pROF(301-305)                                                        | M31591    | 0.6  | 10.5 | 1.9 | 0.4  | 540    | 2,744  | 1,123  | 642    |
| Mouse CDO (Cdo) mRNA, complete cds                                                                        | AF090866  | 0.6  | 2.5  | 1.0 | 0.3  | 477    | 782    | 617    | 536    |
| Mouse mRNA for collagen type XIV, partial                                                                 | AJ131395  | 0.5  | 2.5  | 1.1 | 0.3  | 481    | 845    | 637    | 543    |
| Incyte EST                                                                                                | N.A.      | 0.6  | 1.1  | 1.5 | 0.3  | 739    | 1,105  | 1,699  | 730    |
| PMEPA1 protein                                                                                            | AAF86322  | 3.7  | 1.7  | 0.6 | 3.3  | 11,547 | 9,480  | 7,302  | 15,650 |
| SKAP55                                                                                                    | CAA72101  | 12.4 | 2.6  | 0.9 | 13.5 | 1,027  | 608    | 561    | 1,404  |
| Rattus norvegicus cDNA clone UI-R-DM1-ckc-1-19-0-UI 3'                                                    | BM391951  | 6.2  | 2.7  | 1.3 | 9.1  | 1,018  | 741    | 689    | 2,274  |
| KIAA0967 protein                                                                                          | BAA76811  | 3.3  | 3.9  | 1.0 | 5.5  | 2,678  | 3,574  | 1,945  | 8,228  |
| Incyte EST                                                                                                | N.A.      | 3.3  | 3.2  | 0.9 | 6.6  | 3,182  | 3,250  | 1,894  | 9,390  |
| Mouse chromosome 17 clone GS1-11M9 strain 129svj, complete sequence                                       | AC087216  | 5.9  | 3.2  | 1.1 | 6.2  | 1,335  | 1,002  | 783    | 2,283  |
| Rat mRNA for sensory neuron synuclein                                                                     | X86789    | 28.1 | 4.3  | 1.8 | 29.5 | 10,687 | 3,114  | 2,181  | 21,682 |
| Mouse serine protease inhibitor (SPI3) mRNA, complete cds                                                 | U25844    | 7.3  | 5.2  | 2.2 | 9.0  | 20,170 | 19,122 | 15,183 | 35,108 |
| Rat lens mRNA for aldose reductase (AR, EC 1.1.1.21)                                                      | X05884    | 4.0  | 5.0  | 2.4 | 11.3 | 16,125 | 26,177 | 23,892 | 41,140 |
| Mouse chromosome 10 popeye protein 3 (Pop3) mRNA, complete cds                                            | AF204176  | 5.8  | 4.1  | 1.8 | 10.2 | 1,211  | 1,213  | 976    | 2,484  |
| Mouse mRNA for T-cadherin, complete cds                                                                   | AB022100  | 5.7  | 5.7  | 1.4 | 11.0 | 6,291  | 6,875  | 3,543  | 14,082 |
| Incyte EST                                                                                                | N.A.      | 2.7  | 2.0  | 1.0 | 7.8  | 2,308  | 2,037  | 1,806  | 10,085 |
| FK506 binding protein precursor                                                                           | AAF63478  | 3.3  | 2.4  | 1.2 | 6.4  | 5,323  | 4,200  | 3,763  | 12,044 |
| Mouse partial mRNA for dysferlin (dysf gene)                                                              | AJ242954  | 6.3  | 4.3  | 1.8 | 25.9 | 1,808  | 1,638  | 1,161  | 8,877  |
| Incyte EST                                                                                                | N.A.      | 2.0  | 2.1  | 0.8 | 4.3  | 6,133  | 6,880  | 4,323  | 19,364 |
| Mouse Eya2 homolog mRNA, partial cds                                                                      | U61111    | 2.8  | 5.6  | 0.2 | 54.1 | 1,627  | 2,960  | 656    | 14,407 |
| Incyte EST                                                                                                | N.A.      | 1.4  | 1.7  | 0.5 | 5.3  | 2,633  | 3,578  | 1,866  | 11,629 |
| polyprotein                                                                                               | AAG10201  | 1.6  | 1.3  | 0.9 | 6.0  | 536    | 529    | 557    | 1,096  |
| transcribed sequence with moderate similarity to protein ref:NP_001227.1 (H.sapiens) carbonyl reductase 3 | BQ206123  | 0.6  | 1.5  | 1.5 | 4.3  | 1,979  | 4,281  | 6,277  | 13,997 |
| similar to AD037 protein containing RaIGDS/AF-6 domain                                                    | BI293840  | 0.5  | 1.4  | 1.0 | 5.0  | 978    | 2,091  | 2,203  | 7,681  |
| similar to AD037 protein containing RaIGDS/AF-6 domain                                                    | XM_232305 | 0.6  | 1.5  | 1.0 | 5.8  | 688    | 1,335  | 1,441  | 4,833  |

|                                                                                                                                                         |           |     |     |     |       |        |        |        |        |
|---------------------------------------------------------------------------------------------------------------------------------------------------------|-----------|-----|-----|-----|-------|--------|--------|--------|--------|
| axonemal dynein heavy chain                                                                                                                             | CAB94756  | 1.0 | 2.6 | 1.0 | 4.0   | 915    | 1,937  | 1,451  | 4,044  |
| Rat inhibitor of apoptosis protein 1 mRNA, complete cds                                                                                                 | AF183430  | 2.2 | 5.6 | 1.8 | 13.0  | 714    | 1,209  | 840    | 3,038  |
| Cricetulus griseus layilin mRNA, complete cds                                                                                                           | AF093673  | 1.3 | 0.7 | 1.2 | 6.9   | 592    | 539    | 732    | 1,746  |
| Rattus norvegicus cDNA clone UI-R-DS0-cje-d-16-0-UI 3'                                                                                                  | BM383125  | 1.3 | 3.4 | 1.0 | 28.9  | 460    | 571    | 509    | 1,411  |
| INCYTE EST                                                                                                                                              | N.A.      | 0.9 | 1.8 | 1.0 | 5.2   | 641    | 1,115  | 982    | 2,803  |
| INCYTE EST                                                                                                                                              | N.A.      | 0.9 | 1.0 | 1.5 | 4.7   | 707    | 812    | 1,365  | 3,501  |
| INCYTE EST                                                                                                                                              | N.A.      | 0.8 | 0.9 | 2.2 | 6.1   | 640    | 741    | 1,556  | 3,862  |
| INCYTE EST                                                                                                                                              | N.A.      | 1.1 | 1.3 | 1.3 | 4.8   | 534    | 552    | 669    | 1,093  |
| neuronal tryptophane hydroxylase (Thp2)                                                                                                                 | NM_173839 | 1.6 | 1.5 | 1.3 | 6.4   | 795    | 823    | 917    | 1,922  |
| Rattus norvegicus cDNA clone UI-R-C2p-qn-b-09-0-UI 3'.45nt similar to hypothetical Eukaryotic thiol (cysteine) proteases active site containing protein | AI555069  | 1.5 | 2.0 | 1.5 | 11.4  | 944    | 1,147  | 1,292  | 5,727  |
| Rat rabphilin-3a related protein mRNA, complete cds.                                                                                                    | AF022774  | 1.1 | 2.0 | 1.6 | 5.7   | 650    | 864    | 1,025  | 2,059  |
| Incyte EST                                                                                                                                              | N.A.      | 1.5 | 1.7 | 1.3 | 7.1   | 826    | 970    | 1,122  | 3,207  |
| Rattus norvegicus neuroglobin (Ngb), mRNA                                                                                                               | NM_033359 | 1.8 | 2.6 | 6.9 | 65.8  | 1,145  | 1,777  | 5,498  | 22,448 |
| cytochrome b-561 (Cyb561)                                                                                                                               | NP_031831 | 1.4 | 1.6 | 2.7 | 28.3  | 6,028  | 9,694  | 19,679 | 42,424 |
| Rattus norvegicus cDNA clone UI-R-A0-bf-d-10-0-UI 3' similar to emb X60819 HMSAOP14 H.sapiens DNA for monoamine oxidase type A (14)                     | AA858657  | 1.9 | 2.5 | 3.0 | 16.9  | 1,877  | 2,813  | 4,404  | 14,224 |
| Rat Guanine nucleotide-binding protein G(S), $\alpha$ subunit (Adenylate cyclase-stimulating G $\alpha$ protein).                                       | AF107845  | 1.3 | 2.6 | 2.5 | 21.0  | 10,689 | 18,380 | 25,686 | 40,956 |
| Rattus norvegicus LOC299269 (LOC299269), mRNA weakly similar to interferon, $\alpha$ -inducible protein 27-like                                         | XM_238467 | 1.7 | 1.4 | 2.2 | 24.9  | 1,896  | 1,874  | 4,257  | 22,562 |
| Rat copper transporter 1 mRNA, complete cds                                                                                                             | AF268030  | 2.0 | 2.3 | 1.7 | 39.1  | 2,810  | 3,704  | 4,602  | 35,292 |
| Rattus norvegicus cDNA clone UI-R-EA0-ckw-i-06-0-UI 3' weakly similar to CDP-diacylglycerol synthase (phosphatidate cytidyltransferase) 2               | BQ196724  | 1.5 | 1.7 | 1.2 | 13.0  | 2,713  | 3,329  | 3,496  | 20,752 |
| Mouse Ccte gene for chaperonin containing TCP-1 $\epsilon$ subunit, complete cds.                                                                       | AB022158  | 2.6 | 2.0 | 1.6 | 100.6 | 947    | 977    | 1,169  | 38,798 |
| Rattus norvegicus cDNA clone RGIDW96                                                                                                                    | AW916943  | 1.2 | 1.3 | 5.0 | ##### | 725    | 822    | 1,131  | 2,192  |
| Rattus norvegicus cDNA clone UI-R-C1-lm-g-11-0-UI 5'                                                                                                    | BF559920  | 1.9 | 2.3 | 1.8 | 22.5  | 1,145  | 1,296  | 1,584  | 14,046 |
| Rat mama mRNA, complete cds. (=PEPTIDYLPROLYL ISOMERASE C-ASSOCIATED PROTEIN )                                                                          | AF065438  | 2.0 | 3.0 | 1.6 | 7.8   | 2,226  | 3,492  | 3,027  | 12,459 |
| collectin 34                                                                                                                                            | BAA81747  | 2.2 | 3.8 | 2.3 | 20.3  | 1,163  | 1,827  | 1,756  | 10,535 |

|                                                                                                                                            |          |     |     |       |       |       |        |        |        |
|--------------------------------------------------------------------------------------------------------------------------------------------|----------|-----|-----|-------|-------|-------|--------|--------|--------|
| Rattus norvegicus cDNA clone UI-R-CN1-cjg-c-10-0-UI 3.                                                                                     | BM386534 | 0.7 | 1.8 | 2.2   | 4.6   | 661   | 1,365  | 1,990  | 2,906  |
| Rat mRNA for Rab3B protein                                                                                                                 | Y14019   | 0.7 | 2.4 | 2.3   | 10.8  | 2,618 | 8,350  | 13,009 | 27,863 |
| Rattus norvegicus cDNA clone UI-R-DK0-ceq-g-09-0-UI 3' similar to hypothetical protein DKFZp564B1162 with RHOGAP domain                    | BI295380 | 0.9 | 2.0 | 1.5   | 4.1   | 2,178 | 5,041  | 5,428  | 11,832 |
| Rat monoamine oxidase A gene, complete cds                                                                                                 | D00688   | 0.8 | 1.5 | 1.7   | 8.3   | 9,880 | 21,161 | 37,077 | 48,513 |
| Rat monoamine oxidase A gene, complete cds                                                                                                 | D00688   | 0.8 | 1.2 | 1.8   | 11.8  | 1,753 | 2,532  | 4,895  | 26,907 |
| poly(rC)-binding protein 3 (Pcbp3)                                                                                                         | AF176327 | 1.6 | 1.0 | 0.9   | 4.4   | 9,421 | 7,577  | 11,146 | 25,390 |
| neuronal tetraspanin                                                                                                                       | AAF19031 | 0.9 | 1.4 | 0.9   | 9.5   | 525   | 648    | 665    | 2,351  |
| Rat fructose-1,6-bisphosphatase mRNA, complete cds                                                                                         | M86240   | 0.6 | 1.0 | 0.9   | 35.4  | 504   | 565    | 660    | 4,802  |
| Rat dopamine $\beta$ -hydroxylase mRNA, complete cds                                                                                       | L12407   | 0.9 | 0.7 | 0.8   | 593.9 | 516   | 520    | 616    | 45,334 |
| Mouse pigment epithelium-derived factor (PEDF) mRNA, complete cds                                                                          | AF036164 | 1.0 | 1.1 | 1.0   | 12.2  | 575   | 595    | 716    | 2,863  |
| Rat dopamine $\beta$ -hydroxylase mRNA, complete cds                                                                                       | L12407   | 1.3 | 1.0 | 1.1   | 31.4  | 510   | 485    | 624    | 1,965  |
| INCYTE EST                                                                                                                                 | N.A.     | 0.9 | 0.9 | 0.9   | 5.6   | 799   | 986    | 1,345  | 3,372  |
| Incyte EST no sequence supplied                                                                                                            | N.A.     | 0.9 | 0.8 | 0.7   | 9.7   | 513   | 521    | 595    | 1,254  |
| Mouse RIBP (Ribp) mRNA, complete cds                                                                                                       | AF203343 | 1.0 | 1.4 | 1.5   | 23.7  | 453   | 500    | 534    | 1,604  |
| INCYTE EST                                                                                                                                 | N.A.     | 1.4 | 1.2 | 1.3   | 5.2   | 652   | 750    | 1,031  | 2,755  |
| Rat amino acid transporter y+LAT1 mRNA, complete cds                                                                                       | AF200684 | 1.7 | 1.0 | 2.1   | 5.1   | 1,564 | 1,225  | 2,656  | 5,328  |
| palate, lung, and nasal epithelium expressed transcript (Plunc)                                                                            | U69172   | 0.6 | 9.1 | 6.7   | 5.3   | 454   | 1,346  | 1,146  | 1,043  |
| Rat PND gene encoding atrial natriuretic factor, complete cds                                                                              | K02062   | 0.7 | 1.7 | 11.1  | 2.8   | 917   | 2,039  | 12,349 | 3,939  |
| Rat PND gene encoding atrial natriuretic factor, complete cds                                                                              | K02062   | 0.5 | 1.8 | 14.1  | 2.9   | 992   | 2,798  | 18,650 | 6,657  |
| Rattus norvegicus cDNA clone UI-R-CV1-brw-a-04-0-UI 3' weakly similar to $\gamma$ -aminobutyric acid (GABA-A) receptor, subunit $\epsilon$ | BG373206 | 0.9 | 1.3 | 28.2  | 6.7   | 486   | 565    | 3,802  | 1,461  |
| 10-formyltetrahydrofolate dehydrogenase                                                                                                    | AAA70429 | 1.3 | 1.9 | 8.0   | 4.1   | 584   | 665    | 2,101  | 1,192  |
| Rat (Sprague-Dawley) mRNA for growth hormone-releasing hormone -like peptide                                                               | Z34092   | 1.8 | 1.7 | 133.6 | 21.3  | 580   | 591    | 11,956 | 3,111  |
| Rat CART protein mRNA, complete cds                                                                                                        | U10071   | 0.4 | 0.6 | 19.6  | 5.2   | 2,151 | 4,042  | 51,276 | 25,625 |
| 10-formyltetrahydrofolate dehydrogenase                                                                                                    | AAA70429 | 0.9 | 1.0 | 7.3   | 3.7   | 479   | 506    | 1,154  | 943    |
| Rattus norvegicus cDNA clone UI-R-C4-alq-h-05-0-UI 3'                                                                                      | AW534235 | 0.6 | 1.8 | 3.2   | 6.8   | 486   | 695    | 1,124  | 1,884  |
| ONECUT-2 transcription factor (OC-2)                                                                                                       | CAB38253 | 0.6 | 0.8 | 4.5   | 7.2   | 768   | 1,002  | 5,492  | 7,027  |
| Rat mRNA for glucokinase, alternatively spliced GK2 (EC 2.7.1.1)                                                                           | X53588   | 0.7 | 1.4 | 32.7  | 41.8  | 435   | 545    | 2,304  | 2,882  |
| Incyte EST                                                                                                                                 | N.A.     | 1.1 | 1.0 | 2.6   | 5.5   | 530   | 520    | 845    | 1,243  |



|                                                                                                                                                                     |           |     |     |      |      |        |        |        |        |
|---------------------------------------------------------------------------------------------------------------------------------------------------------------------|-----------|-----|-----|------|------|--------|--------|--------|--------|
| Miwi 2 protein (Miwi2)                                                                                                                                              | AY135692  | 1.1 | 1.5 | 5.3  | 14.5 | 687    | 951    | 2,803  | 4,707  |
| Mus musculus cDNA clone UI-M-DJ2-bwb-j-08-0-UI 3'                                                                                                                   | BQ174977  | 0.5 | 1.0 | 3.9  | 13.4 | 540    | 782    | 2,040  | 7,043  |
| dJ620E11.2 (novel protein similar to KIAA0188, KIAA0249 and yeast SMP2)                                                                                             | CAB57842  | 0.8 | 1.6 | 3.5  | 3.6  | 1,223  | 2,563  | 7,979  | 6,875  |
| Mouse C1q-related factor mRNA, complete cds                                                                                                                         | AF095155  | 1.2 | 3.3 | 4.8  | 7.5  | 1,110  | 2,486  | 4,284  | 5,419  |
| Rattus norvegicus cDNA clone UI-R-BT1-akv-g-05-0-UI 3'                                                                                                              | AW531194  | 1.1 | 3.5 | 7.3  | 6.0  | 639    | 985    | 1,995  | 1,740  |
| Incyte EST                                                                                                                                                          | N.A.      | 1.0 | 2.5 | 5.8  | 5.1  | 719    | 1,254  | 3,037  | 3,039  |
| Rattus norvegicus cDNA clone UI-R-C0-hi-d-02-0-UI 3' similar to Necdin-like protein 1 and melanoma antigen, family L, 2 (Magel2), involved in Prader-Willi syndrome | AA996569  | 1.6 | 5.3 | 10.8 | 4.2  | 2,033  | 6,482  | 16,258 | 7,246  |
| Rat huntingtin associated protein (rHAP1-B) mRNA, complete cds, alternatively spliced form                                                                          | U38370    | 1.3 | 3.7 | 8.2  | 5.5  | 12,898 | 26,823 | 47,599 | 41,910 |
| Rat mRNA for plasma glutathione peroxidase precursor, complete cds                                                                                                  | D00680    | 5.2 | 7.4 | 16.3 | 40.7 | 4,072  | 7,262  | 17,621 | 22,780 |
| unnamed protein product                                                                                                                                             | BAA91387  | 2.2 | 2.2 | 2.8  | 8.5  | 2,770  | 3,345  | 5,614  | 12,005 |
| Mouse ectonucleoside triphosphate diphosphohydrolase 3                                                                                                              | AK046218  | 3.3 | 2.2 | 3.4  | 10.9 | 1,439  | 1,141  | 2,152  | 6,140  |
| KIAA0605 protein protein hypothetical Thrombospondin type I repeat (TSP1) profile/Thrombospondin type I domain containing protein                                   | BAA25531  | 2.4 | 2.7 | 15.2 | 39.2 | 1,416  | 1,932  | 12,129 | 20,186 |
| Mouse neural retina-specific leucine zipper protein (NRL) mRNA, complete cds                                                                                        | L14935    | 1.4 | 1.8 | 3.1  | 6.3  | 498    | 541    | 676    | 971    |
| Incyte EST no sequence supplied                                                                                                                                     | N.A.      | 2.5 | 6.6 | 5.1  | 15.8 | 1,179  | 2,474  | 2,913  | 8,986  |
| Incyte EST                                                                                                                                                          | N.A.      | 1.3 | 2.0 | 7.4  | 7.0  | 622    | 903    | 2,079  | 2,500  |
| Incyte EST no homology                                                                                                                                              | N.A.      | 1.4 | 1.0 | 2.5  | 12.0 | 480    | 461    | 613    | 1,072  |
| Incyte EST similar to hypothetical Peptidase family M20/M25/M40 containing protein or anion transporter/exchanger-9                                                 | N.A.      | 2.5 | 1.0 | 6.2  | 9.0  | 552    | 465    | 894    | 1,014  |
| Incyte EST                                                                                                                                                          | N.A.      | 0.6 | 1.1 | 2.1  | 4.1  | 487    | 595    | 944    | 1,442  |
| Rat synapsin 2a mRNA, complete cds                                                                                                                                  | M27925    | 0.8 | 0.6 | 1.7  | 4.1  | 1,720  | 2,054  | 6,621  | 7,693  |
| Mouse protein tyrosine kinase ZAP-70 mRNA, complete cds                                                                                                             | U04379    | 0.4 | 0.7 | 2.1  | 7.5  | 506    | 663    | 1,463  | 4,628  |
| Rattus norvegicus regucalcin gene promotor region related protein (Rgpr), mRNA                                                                                      | NM_053571 | 0.2 | 0.8 | 1.5  | 3.5  | 780    | 1,477  | 3,328  | 6,976  |
| Rattus norvegicus cDNA clone UI-R-BO0-ahn-f-03-0-UI 3'                                                                                                              | AW522862  | 0.4 | 1.2 | 0.3  | 5.3  | 1,485  | 3,598  | 1,733  | 15,050 |
| Rattus norvegicus cDNA clone UI-R-CW0-bvx-g-01-0-UI 3'                                                                                                              | BG371623  | 0.4 | 0.4 | 0.9  | 3.8  | 529    | 530    | 882    | 2,690  |
| Mouse TNF receptor associated factor 1 (TRAF1) mRNA, complete cds                                                                                                   | L35302    | 0.7 | 0.7 | 1.0  | 5.0  | 525    | 545    | 681    | 1,601  |

|                                                                                                                                             |          |     |     |     |      |       |        |        |        |
|---------------------------------------------------------------------------------------------------------------------------------------------|----------|-----|-----|-----|------|-------|--------|--------|--------|
| Rat PGES mRNA for prostaglandin E synthase, complete cds                                                                                    | AB041998 | 0.5 | 1.0 | 1.2 | 4.0  | 501   | 639    | 896    | 1,959  |
| Rat $\gamma$ glutamyl transpeptidase-related enzyme mRNA, partial cds                                                                       | U76252   | 0.4 | 0.8 | 1.2 | 10.8 | 507   | 646    | 950    | 4,413  |
| Rat mRNA for Ig heavy chain VDJ-region CH1-CH2                                                                                              | X68782   | 0.4 | 0.6 | 0.8 | 5.0  | 481   | 504    | 663    | 1,246  |
| unnamed protein product, no homology                                                                                                        | BAA91309 | 0.4 | 0.5 | 0.9 | 18.9 | 701   | 649    | 1,021  | 9,625  |
| Rat gelatinase A mRNA, complete cds                                                                                                         | U65656   | 0.8 | 0.7 | 0.3 | 3.6  | 764   | 865    | 807    | 3,786  |
| Rattus norvegicus cDNA clone UI-R-CA1-bbw-h-04-0-UI 3'                                                                                      | BF387974 | 0.7 | 0.6 | 0.2 | 3.9  | 3,382 | 3,061  | 2,200  | 17,874 |
| Rattus norvegicus cDNA clone UI-R-BT1-ako-f-11-0-UI 5'. Similar to sodium-dependent bile acid transporter                                   | BF565662 | 0.5 | 0.6 | 0.3 | 10.5 | 559   | 648    | 618    | 5,363  |
| Rattus norvegicus cDNA clone UI-R-BU0-anb-h-08-0-UI 3'. Weakly similar to zinc finger protein, multitype 1; Friend of GATA-1 [Mus musculus] | AW533438 | 0.9 | 0.4 | 0.3 | 7.5  | 621   | 516    | 595    | 3,433  |
| Rat mRNA for I-gicerin/MUC18, complete cds                                                                                                  | AB035506 | 0.7 | 0.7 | 0.4 | 4.3  | 2,542 | 3,373  | 3,278  | 11,573 |
| Rattus norvegicus copper transporter 1 mRNA, complete cds.AF268030                                                                          | AF268030 | 0.6 | 0.5 | 0.6 | 7.4  | 1,504 | 1,569  | 2,402  | 19,509 |
| Mus musculus transcription factor AP-2 $\beta$ , full insert sequence                                                                       | AK028906 | 0.3 | 0.4 | 0.4 | 19.2 | 439   | 450    | 497    | 2,885  |
| Rat mRNA for long-chain acyl-CoA synthetase (EC 6.2.1.3).                                                                                   | D90109   | 0.6 | 0.8 | 0.8 | 4.9  | 8,283 | 10,577 | 17,140 | 44,874 |
| unnamed protein product                                                                                                                     | BAB14064 | 0.3 | 0.3 | 0.5 | 67.4 | 856   | 875    | 1,602  | 41,856 |
| Rat $\beta$ -alanine synthase mRNA, complete cds.                                                                                           | M97662   | 0.4 | 0.4 | 0.6 | 6.8  | 484   | 501    | 658    | 2,106  |
| Mitochondrial uncoupling protein 3 UCP3                                                                                                     | U92069   | 0.8 | 0.8 | 0.7 | 4.5  | 490   | 531    | 574    | 1,208  |
| Rattus norvegicus cDNA clone UI-R-C3-te-e-09-0-UI 3'                                                                                        | AI548631 | 0.3 | 0.4 | 0.4 | 5.8  | 498   | 510    | 586    | 1,831  |
| Mouse pigment epithelium-derived factor (PEDF) mRNA, complete cds                                                                           | AF036164 | 0.1 | 0.2 | 0.2 | 12.7 | 479   | 674    | 710    | 12,720 |
| Rat $\alpha$ 1 type V collagen mRNA, complete cds                                                                                           | AF272662 | 0.4 | 0.6 | 0.3 | 5.5  | 731   | 1,062  | 995    | 5,186  |
| Rattus norvegicus cDNA clone UI-R-CV2-cht-d-08-0-UI 3'                                                                                      | BI299288 | 0.3 | 0.5 | 0.3 | 6.9  | 478   | 612    | 648    | 3,805  |
| Rat aldehyde dehydrogenase mRNA, complete cds                                                                                               | J03637   | 0.6 | 0.6 | 0.7 | 12.0 | 452   | 481    | 535    | 1,490  |
| Rat fibrillin-1 mRNA, complete cds.                                                                                                         | AF135059 | 0.5 | 1.7 | 0.9 | 3.5  | 698   | 1,322  | 1,206  | 4,118  |
| Incyte EST                                                                                                                                  | N.A.     | 0.3 | 0.3 | 3.6 | 2.8  | 806   | 894    | 7,568  | 5,886  |
| Rat adenylyl cyclase mRNA, complete cds                                                                                                     | M80550   | 0.2 | 0.4 | 1.1 | 2.5  | 2,590 | 4,382  | 16,833 | 30,044 |
| Rat degenerin channel MDEG mRNA, complete cds                                                                                               | U53211   | 0.2 | 0.2 | 1.4 | 2.5  | 648   | 752    | 3,169  | 3,944  |
| Incyte EST                                                                                                                                  | N.A.     | 0.2 | 0.3 | 1.5 | 2.0  | 865   | 1,489  | 8,077  | 10,517 |
| unnamed protein product                                                                                                                     | BAB15639 | 0.3 | 0.6 | 1.2 | 1.5  | 629   | 1,102  | 2,523  | 2,789  |

|                                                                                                              |          |     |     |     |     |       |       |        |        |
|--------------------------------------------------------------------------------------------------------------|----------|-----|-----|-----|-----|-------|-------|--------|--------|
| KIAA0808 protein                                                                                             | BAA34528 | 0.1 | 0.3 | 0.8 | 2.2 | 520   | 862   | 1,709  | 4,581  |
| PNG protein                                                                                                  | CAA66121 | 0.3 | 0.2 | 1.0 | 2.0 | 585   | 578   | 1,121  | 1,360  |
| Mouse CD40 mRNA, complete cds                                                                                | M83312   | 0.2 | 0.4 | 0.4 | 2.5 | 488   | 617   | 734    | 1,558  |
| Mouse EIG 180 mRNA for ethanol induced gene product, complete cds                                            | AB023957 | 0.2 | 0.7 | 0.5 | 3.0 | 623   | 1,283 | 1,610  | 4,637  |
| Rat heat stable antigen CD24 mRNA, complete cds                                                              | U49062   | 0.1 | 0.5 | 0.3 | 3.5 | 611   | 1,630 | 1,611  | 9,525  |
| Rattus norvegicus cDNA clone UI-R-DK0-cez-c-07-0-UI 3'                                                       | BI296344 | 0.3 | 0.2 | 0.6 | 2.2 | 1,476 | 1,517 | 5,670  | 12,932 |
| Rat $\beta$ -alanine synthase mRNA, complete cds                                                             | M97662   | 0.1 | 0.2 | 0.4 | 6.4 | 470   | 492   | 700    | 3,077  |
| Rattus norvegicus cDNA clone UI-R-BJ0-aeo-b-12-0-UI 3'                                                       | AW254017 | 0.2 | 0.3 | 0.1 | 2.9 | 664   | 977   | 757    | 7,225  |
| chromatin remodeling factor WCRF180                                                                          | AAF32366 | 0.2 | 0.2 | 0.4 | 2.5 | 519   | 513   | 693    | 2,003  |
| Mouse mRNA for IGFBP-like protein, complete cds.                                                             | AB006141 | 0.2 | 0.3 | 1.5 | 1.3 | 480   | 559   | 1,488  | 1,620  |
| Rattus norvegicus cDNA clone UI-R-CV0-brm-d-06-0-UI 3'                                                       | BG372104 | 0.1 | 0.3 | 1.0 | 1.2 | 633   | 1,400 | 5,673  | 5,316  |
| Rat Edg-1 orphan receptor (edg-1) mRNA, complete cds                                                         | U10303   | 0.2 | 0.4 | 1.0 | 0.8 | 2,787 | 5,675 | 20,543 | 13,856 |
| Rat neuronal olfactomedin-related ER localized protein (D2Sut1e) mRNA, complete cds.                         | U03417   | 0.1 | 0.4 | 0.7 | 0.9 | 2,147 | 7,826 | 21,702 | 19,831 |
| Rat glucocorticoid receptor mRNA, complete cds                                                               | M14053   | 0.2 | 0.4 | 0.6 | 1.1 | 1,981 | 2,748 | 6,518  | 7,103  |
| Incyte EST                                                                                                   | N.A.     | 0.1 | 0.2 | 0.6 | 1.3 | 694   | 1,068 | 3,227  | 5,604  |
| Rat glutathione S-transferase mRNA, complete cds                                                             | J03752   | 0.2 | 0.2 | 0.5 | 1.3 | 1,104 | 1,745 | 4,811  | 10,599 |
| Rat hepatic product spot 14, gene and flanks                                                                 | K01934   | 0.1 | 0.1 | 0.5 | 0.7 | 556   | 648   | 1,643  | 2,137  |
| Cricetinae gen. sp. insulin receptor tyrosine kinase 53 kDa substrate mRNA, complete cds                     | U41899   | 0.1 | 0.1 | 0.5 | 1.0 | 573   | 729   | 2,048  | 3,645  |
| Rat myr 6 myosin heavy chain mRNA, complete cds.                                                             | U60416   | 0.1 | 0.1 | 0.9 | 0.8 | 609   | 948   | 5,643  | 5,055  |
| Rat mRNA for pre- $\alpha$ -inhibitor, heavy chain 3                                                         | X83231   | 0.2 | 0.3 | 0.7 | 1.0 | 4,388 | 5,149 | 18,162 | 21,423 |
| unnamed protein product                                                                                      | BAA92093 | 0.2 | 0.3 | 0.9 | 1.0 | 694   | 805   | 2,285  | 2,398  |
| Incyte EST                                                                                                   | N.A.     | 0.5 | 0.2 | 0.2 | 0.9 | 1,074 | 792   | 1,070  | 3,596  |
| Mouse mas proto-oncogene and Igf2r gene for insulin-like growth factor type 2 and L41ps and Au76 pseudogenes | AJ249895 | 0.1 | 0.3 | 0.4 | 0.8 | 587   | 766   | 1,320  | 2,563  |
| Rat mRNA for RT1.B-1( $\alpha$ ) chain of integral membrane protein                                          | X14879   | 0.1 | 0.3 | 0.1 | 1.0 | 651   | 975   | 780    | 3,472  |
| Rat mRNA for MHC class II-associated invariant chain                                                         | X14254   | 0.1 | 0.1 | 0.1 | 1.1 | 864   | 965   | 1,128  | 5,231  |
| Rat (diabetic BB) MHC class II $\alpha$ chain RT1.D $\alpha$ (u)                                             | Y00480   | 0.1 | 0.1 | 0.1 | 0.9 | 665   | 650   | 727    | 2,856  |
| Mouse clone 41 developing liver stage specific mRNA                                                          | U06946   | 0.2 | 0.3 | 0.3 | 1.2 | 1,257 | 1,546 | 2,488  | 8,157  |

|                                                                                                                                                                                    |          |     |     |      |     |       |       |        |        |
|------------------------------------------------------------------------------------------------------------------------------------------------------------------------------------|----------|-----|-----|------|-----|-------|-------|--------|--------|
| Rat xanthine dehydrogenase mRNA, complete cds                                                                                                                                      | J05579   | 0.2 | 0.3 | 0.3  | 1.5 | 652   | 734   | 959    | 3,025  |
| Rat xanthine dehydrogenase mRNA, complete cds.                                                                                                                                     | J05579   | 0.2 | 0.2 | 0.3  | 1.4 | 678   | 785   | 1,147  | 3,999  |
| Rat cardiac troponin T mRNA, complete cds, clone RCT11                                                                                                                             | M26051   | 0.1 | 0.1 | 0.1  | 2.9 | 549   | 728   | 825    | 9,185  |
| INCYTE EST                                                                                                                                                                         | N.A.     | 0.2 | 0.2 | 0.3  | 2.1 | 742   | 938   | 1,588  | 6,907  |
| Incyte EST                                                                                                                                                                         | N.A.     | 0.3 | 0.3 | 0.5  | 1.4 | 679   | 792   | 1,295  | 3,065  |
| Rat neuropeptide Y mRNA, complete cds                                                                                                                                              | M15880   | 0.0 | 0.1 | 0.1  | 4.4 | 656   | 889   | 1,759  | 25,043 |
| Rat m1 muscarinic acetylcholine receptor gene                                                                                                                                      | M16406   | 0.1 | 0.1 | 0.2  | 1.4 | 545   | 601   | 790    | 2,816  |
| Mouse mRNA for src-like adaptor protein                                                                                                                                            | AJ131777 | 0.0 | 0.1 | 0.0  | 0.7 | 617   | 850   | 658    | 3,873  |
| Rat fos-related antigen DNA, exon 4                                                                                                                                                | X98051   | 0.1 | 0.1 | 0.1  | 0.4 | 621   | 813   | 1,444  | 3,785  |
| Rat mRNA for muscle C-protein                                                                                                                                                      | X90475   | 0.1 | 0.1 | 0.1  | 0.4 | 475   | 503   | 569    | 1,025  |
| Mouse mRNA for estrogen-responsive finger protein, complete cds                                                                                                                    | D63902   | 0.2 | 0.2 | 0.2  | 0.8 | 1,030 | 1,037 | 1,353  | 4,203  |
| Rat mRNA for cyclin B                                                                                                                                                              | X64589   | 0.3 | 0.2 | 0.3  | 1.1 | 1,191 | 1,136 | 1,750  | 5,360  |
| Mouse ataxin 2-binding protein (A2bp) mRNA, complete cds                                                                                                                           | AF107204 | 0.1 | 0.1 | 0.2  | 1.0 | 863   | 1,191 | 2,605  | 7,022  |
| Incyte EST                                                                                                                                                                         | N.A.     | 0.2 | 0.2 | 0.3  | 0.8 | 950   | 1,278 | 2,574  | 6,202  |
| Mouse ataxin 2-binding protein (A2bp) mRNA, complete cds                                                                                                                           | AF107204 | 0.1 | 0.1 | 0.1  | 0.6 | 533   | 630   | 870    | 1,972  |
| Rat heat shock protein 27 (hsp 27) gene, complete cds                                                                                                                              | S67755   | 0.1 | 0.2 | 0.1  | 0.6 | 614   | 820   | 1,007  | 2,291  |
| INCYTE EST                                                                                                                                                                         | N.A.     | 0.3 | 0.2 | 0.4  | 1.4 | 653   | 669   | 1,036  | 2,267  |
| INCYTE EST                                                                                                                                                                         | N.A.     | 0.3 | 0.2 | 0.4  | 1.3 | 534   | 526   | 747    | 1,631  |
| Mouse major histocompatibility locus class III regions Hsc70t gene, partial cds; smRNP, G7A, NG23, MutS homolog, CLCP, NG24, NG25, and NG26 genes, complete cds; and unknown genes | AF109905 | 0.3 | 0.5 | 0.2  | 1.9 | 1,202 | 1,886 | 1,652  | 7,102  |
| Rat connexin (CXN-37) gene, complete cds                                                                                                                                           | M76532   | 0.3 | 0.3 | 0.3  | 1.6 | 531   | 647   | 779    | 1,752  |
| Rat pituitary adenylate cyclase activating polypeptide precursor protein mRNA, complete cds                                                                                        | M63006   | 0.2 | 4.0 | 0.3  | 1.4 | 591   | 5,171 | 1,194  | 3,115  |
| Neuroblastoma                                                                                                                                                                      | BAA13745 | 0.9 | 0.3 | 2.4  | 0.2 | 580   | 484   | 1,177  | 554    |
| Rat mRNA for hepatocyte nuclear factor 6 $\alpha$                                                                                                                                  | X96553   | 0.1 | 0.5 | 27.4 | 0.3 | 478   | 752   | 20,202 | 783    |
| Rat vesicular GABA transporter (VGAT) mRNA, complete cds                                                                                                                           | AF030253 | 0.5 | 0.7 | 4.2  | 0.5 | 1,417 | 1,791 | 8,094  | 1,853  |
| Rat developmentally regulated intestinal protein (OCI-5) mRNA (glypican 3), complete cds                                                                                           | M22400   | 0.3 | 0.7 | 26.3 | 0.3 | 608   | 1,317 | 20,753 | 934    |
| Mus musculus LIM domain only 2 (rhombotin homolog 2)                                                                                                                               | A39370   | 0.4 | 0.6 | 5.5  | 0.4 | 754   | 936   | 5,558  | 978    |

|                                                                                                                                                                          |           |     |     |      |     |       |       |        |       |
|--------------------------------------------------------------------------------------------------------------------------------------------------------------------------|-----------|-----|-----|------|-----|-------|-------|--------|-------|
| Mouse mRNA for Lim-homeodomain protein Islet1                                                                                                                            | AJ132765  | 0.4 | 0.3 | 21.4 | 0.2 | 503   | 528   | 9,267  | 590   |
| Rattus norvegicus cDNA clone UI-R-BS2-bdy-g-07-0-UI 3'                                                                                                                   | BF396492  | 0.3 | 0.5 | 40.0 | 0.2 | 451   | 521   | 8,549  | 539   |
| UI-R-C4-aly-h-12-0-UI.s1 UI-R-C4 Rattus norvegicus cDNA clone UI-R-C4-aly-h-12-0-UI similar to HNF6 Hepatocyte nuclear factor 6 (HNF-6) (One cut domain family member 1) | AW535616  | 0.5 | 0.4 | 89.1 | 0.4 | 446   | 458   | 8,694  | 532   |
| Rat TTF-1 mRNA for thyroid nuclear factor 1                                                                                                                              | X53858    | 0.3 | 0.3 | 10.4 | 0.3 | 464   | 462   | 2,399  | 531   |
| Rat homeoprotein (rDlx) mRNA, complete cds                                                                                                                               | L24443    | 0.2 | 0.2 | 7.2  | 0.1 | 472   | 473   | 1,773  | 523   |
| Rattus norvegicus cDNA clone UI-R-C2p-qq-c-12-0-UI 3'                                                                                                                    | AI555460  | 0.3 | 0.3 | 4.5  | 0.3 | 498   | 503   | 2,311  | 555   |
| Rattus norvegicus cDNA clone UI-R-BO1-ajs-b-09-0-UI 3'. Weakly similar to immunoglobulin superfamily containing leucine-rich repeat, (slit homolog 1?)                   | AW527248  | 0.1 | 0.1 | 8.2  | 0.1 | 563   | 617   | 11,795 | 733   |
| Rat enkephalinase (neutral endopeptidase) mRNA                                                                                                                           | M15944    | 0.2 | 0.3 | 8.9  | 0.2 | 475   | 554   | 5,267  | 653   |
| Rattus norvegicus cDNA clone UI-R-A1-dw-d-10-0-UI 3'                                                                                                                     | AA901371  | 0.7 | 1.2 | 3.3  | 0.3 | 1,159 | 2,068 | 7,366  | 976   |
| Mouse stanniocalcin precursor, mRNA, complete cds                                                                                                                        | AF099098  | 0.2 | 0.8 | 2.9  | 0.7 | 497   | 845   | 1,770  | 786   |
| Mouse retinaldehyde dehydrogenase 3 mRNA, complete cds                                                                                                                   | AF253409  | 0.9 | 0.7 | 7.1  | 0.4 | 1,360 | 1,141 | 6,462  | 969   |
| Rat mRNA for prepronociceptin                                                                                                                                            | X97375    | 0.7 | 0.5 | 5.8  | 1.1 | 1,270 | 1,338 | 11,096 | 3,090 |
| Rat mRNA for vascular type-1 angiotensin II receptor                                                                                                                     | X62295    | 0.2 | 1.2 | 5.2  | 0.1 | 458   | 755   | 2,279  | 522   |
| Mouse phospholipid scramblase 1 mRNA, complete cds.                                                                                                                      | AF159593  | 0.3 | 1.1 | 2.3  | 1.3 | 492   | 714   | 1,327  | 1,061 |
| putative secreted protein ZSIG9                                                                                                                                          | AAF01433  | 1.9 | 4.1 | 0.1  | 0.2 | 904   | 1,850 | 543    | 636   |
| Mus musculus RIKEN cDNA 5430406M13 gene (5430406M13Rik), mRNA similar to mesenchymal stem cell protein DSC54                                                             | XM_128866 | 2.8 | 3.3 | 0.5  | 0.2 | 1,468 | 1,527 | 834    | 628   |
| Rat $\alpha$ -1B adrenergic receptor mRNA, complete cds                                                                                                                  | M60655    | 1.5 | 3.8 | 0.8  | 0.2 | 3,678 | 8,541 | 3,597  | 1,130 |
| ESTs Highly similar to cyclin D2                                                                                                                                         | N.A.      | 1.1 | 2.6 | 0.3  | 0.3 | 2,560 | 5,641 | 1,341  | 1,436 |
| Myopodin protein =synaptopodin-2                                                                                                                                         | CAB51856  | 1.2 | 3.2 | 0.4  | 0.2 | 2,379 | 4,926 | 1,364  | 1,222 |
| Mus musculus 2 days neonate thymus thymic cells cDNA, RIKEN full-length enriched library, clone:E430007D18 product:special AT-rich sequence binding protein 1, full      | AK088204  | 2.0 | 1.5 | 0.4  | 0.2 | 6,213 | 5,420 | 2,411  | 1,549 |
| Mus musculus 2 days neonate thymus thymic cells cDNA, RIKEN full-length enriched library, clone:E430007D18 product:special AT-rich sequence binding protein 1, full      | AK088204  | 2.4 | 1.4 | 0.2  | 0.1 | 4,325 | 3,366 | 1,095  | 794   |
| Rat liver $\alpha$ -2-macroglobulin mRNA, complete cds                                                                                                                   | J02635    | 2.0 | 1.9 | 0.5  | 0.2 | 3,066 | 3,949 | 2,077  | 1,086 |

|                                                                                                                                           |           |     |     |     |     |        |        |        |       |
|-------------------------------------------------------------------------------------------------------------------------------------------|-----------|-----|-----|-----|-----|--------|--------|--------|-------|
| Mouse mRNA for cadherin-associated protein (CAP102/ $\alpha$ catenin)                                                                     | D90362    | 1.2 | 1.7 | 0.4 | 0.2 | 14,406 | 20,593 | 11,524 | 5,429 |
| CADHERIN 11                                                                                                                               | X77557    | 1.6 | 2.1 | 0.5 | 0.2 | 5,782  | 8,749  | 3,389  | 1,857 |
| INCYTE EST                                                                                                                                | N.A.      | 2.0 | 3.3 | 0.2 | 0.1 | 6,030  | 11,818 | 2,036  | 1,218 |
| Mus musculus 15 days embryo head cDNA, RIKEN full-length enriched library, clone:D930020D06 product:forkhead box P2, full insert sequence | AK053022  | 2.4 | 4.9 | 0.2 | 0.1 | 1,505  | 2,964  | 616    | 524   |
| Rat Sprague-Dawley SM-20 mRNA, complete cds                                                                                               | U06713    | 2.3 | 1.9 | 0.4 | 0.1 | 1,453  | 1,582  | 925    | 539   |
| C.griseus rhodopsin gene for opsin protein                                                                                                | X61084    | 3.2 | 1.4 | 0.4 | 0.2 | 1,488  | 942    | 663    | 596   |
| Rattus norvegicus similar to hypothetical protein dJ434O14.3 [Homo sapiens] (LOC289387), mRNA                                             | XM_213978 | 1.7 | 2.3 | 0.5 | 0.2 | 1,472  | 2,063  | 877    | 705   |
| INCYTE EST                                                                                                                                | N.A.      | 1.2 | 1.4 | 0.5 | 0.2 | 1,040  | 1,229  | 918    | 705   |
| Rattus norvegicus cDNA clone UI-CA1-bix-f-16-0-UI 3'                                                                                      | BF403670  | 3.7 | 2.8 | 0.2 | 0.3 | 3,467  | 3,192  | 783    | 942   |
| Rat mRNA for protein kinase C $\alpha$                                                                                                    | X07286    | 3.4 | 1.1 | 0.2 | 0.5 | 2,360  | 1,092  | 763    | 973   |
| DRNBTE01 Rat DRG Library Rattus norvegicus cDNA clone DRNBTE01 5'                                                                         | BG673363  | 3.4 | 0.9 | 0.3 | 0.3 | 18,737 | 9,850  | 5,933  | 5,488 |
| Mouse TFPI $\beta$ (TFPI $\beta$ ) mRNA, partial cds                                                                                      | AF016313  | 1.0 | 0.9 | 0.2 | 0.2 | 1,251  | 1,277  | 767    | 860   |
| Mouse transgelin mRNA, complete cds                                                                                                       | AF149291  | 1.0 | 1.0 | 0.2 | 0.2 | 3,439  | 3,987  | 1,899  | 1,599 |
| Incyte EST                                                                                                                                | N.A.      | 0.9 | 1.2 | 0.2 | 0.2 | 1,433  | 1,739  | 744    | 1,060 |
| Rat neuritin mRNA, complete cds                                                                                                           | U88958    | 1.5 | 1.1 | 0.1 | 0.4 | 962    | 942    | 547    | 699   |
| Mouse ets-related transcription factor (Etv5) mRNA, complete cds                                                                          | AY004174  | 1.7 | 1.3 | 0.2 | 0.3 | 4,392  | 3,729  | 1,308  | 2,098 |
| Mouse mRNA for voltage gated calcium channel $\alpha$ -2- $\delta$ -C subunit                                                             | AJ010949  | 1.9 | 1.2 | 0.2 | 0.2 | 921    | 903    | 657    | 591   |
| Mouse frezzled (fre) mRNA, complete cds                                                                                                   | U68058    | 1.0 | 0.5 | 0.1 | 0.2 | 766    | 604    | 586    | 618   |
| Mouse left-right dynein (Lrd) mRNA, complete cds                                                                                          | AF183144  | 0.9 | 0.8 | 0.2 | 0.3 | 1,678  | 1,668  | 871    | 1,200 |
| insulin-like growth factor I {exon 6} [rats, Genomic/mRNA, 7224 nt]                                                                       | S43941    | 2.9 | 1.2 | 0.9 | 0.2 | 2,468  | 1,249  | 1,293  | 734   |
| Rat insulin-like growth factor I (IGF-I) mRNA, complete cds                                                                               | M15481    | 4.1 | 1.5 | 0.9 | 0.1 | 6,866  | 4,176  | 3,907  | 929   |
| Mus musculus, claudin 1, clone IMAGE:3493550, mRNA                                                                                        | BC008536  | 0.5 | 2.0 | 0.3 | 0.4 | 498    | 781    | 555    | 560   |
| Rat mRNA for LTBP-2 like protein                                                                                                          | Y12760    | 1.5 | 1.5 | 0.2 | 0.7 | 756    | 706    | 544    | 776   |
| Mouse GARP45 mRNA, complete cds                                                                                                           | AB018374  | 0.8 | 1.3 | 0.6 | 0.2 | 1,342  | 2,188  | 1,699  | 941   |
| Incyte EST                                                                                                                                | N.A.      | 0.8 | 1.2 | 0.8 | 0.2 | 3,579  | 4,866  | 4,764  | 1,689 |
| Mouse mRNA for GATA-3 transcription factor                                                                                                | X55123    | 0.9 | 1.1 | 0.7 | 0.1 | 672    | 720    | 748    | 536   |

|                                                                                                         |          |     |     |     |     |       |        |        |       |
|---------------------------------------------------------------------------------------------------------|----------|-----|-----|-----|-----|-------|--------|--------|-------|
| KIAA1580 protein                                                                                        | BAB13406 | 0.6 | 0.9 | 1.4 | 0.1 | 3,491 | 5,744  | 12,255 | 1,349 |
| Incyte EST                                                                                              | N.A.     | 0.7 | 0.9 | 1.2 | 0.2 | 1,943 | 2,287  | 4,608  | 1,106 |
| Mouse mRNA for P24 protein, complete cds                                                                | D83206   | 0.7 | 0.7 | 1.2 | 0.1 | 6,147 | 8,903  | 20,684 | 1,730 |
| Mouse brain cDNA, clone MNCb-2875.                                                                      | AB041807 | 0.8 | 0.7 | 1.0 | 0.1 | 9,329 | 11,848 | 23,147 | 2,845 |
| Mouse apoptosis-related RNA binding protein (Napor-1) mRNA, complete cds                                | AF090696 | 0.9 | 0.7 | 0.7 | 0.1 | 9,451 | 8,986  | 13,133 | 2,729 |
| Rat mRNA for protein tyrosine phosphatase $\epsilon$ M, partial cds                                     | D78613   | 1.0 | 0.7 | 1.0 | 0.2 | 1,108 | 1,129  | 1,918  | 745   |
| Rat mRNA for protein tyrosine phosphatase $\epsilon$ -like 2, partial                                   | Y07834   | 1.0 | 0.7 | 1.0 | 0.1 | 1,018 | 1,025  | 1,687  | 645   |
| Mouse cell death activator CIDE-A (Cide-a) mRNA, complete cds                                           | AF041376 | 0.7 | 1.7 | 0.5 | 0.1 | 1,066 | 1,936  | 1,155  | 568   |
| Mouse retinally abundant regulator of G-protein signaling mRGS-r (RGS-r) mRNA, complete cds             | U94828   | 2.4 | 2.0 | 0.9 | 0.1 | 3,453 | 3,607  | 2,780  | 658   |
| Rat clone C53 CDK5 activator-binding protein mRNA, complete cds                                         | AF177476 | 1.1 | 1.7 | 0.8 | 0.2 | 2,972 | 4,509  | 3,800  | 1,231 |
| Incyte EST                                                                                              | N.A.     | 1.1 | 1.2 | 1.0 | 0.1 | 3,139 | 4,474  | 6,371  | 1,108 |
| Incyte EST                                                                                              | N.A.     | 1.2 | 1.1 | 0.6 | 0.2 | 1,534 | 1,545  | 1,388  | 734   |
| Rat calcium-independent $\alpha$ -latrotoxin receptor homolog 2 (CIRL-2) mRNA, complete cds             | AF063102 | 1.3 | 1.2 | 3.1 | 0.1 | 2,837 | 3,115  | 9,132  | 741   |
| Rat calcium-independent $\alpha$ -latrotoxin receptor homolog 2 (CIRL-2) mRNA, complete cds             | AF063102 | 1.2 | 1.2 | 3.1 | 0.1 | 7,531 | 8,236  | 26,920 | 1,203 |
| Incyte EST                                                                                              | N.A.     | 0.9 | 0.9 | 1.7 | 0.1 | 5,284 | 4,690  | 14,994 | 1,928 |
| Incyte EST                                                                                              | N.A.     | 1.5 | 1.1 | 2.0 | 0.2 | 4,214 | 4,174  | 9,437  | 1,640 |
| Incyte EST                                                                                              | N.A.     | 1.3 | 0.6 | 2.1 | 0.2 | 842   | 687    | 1,805  | 566   |
| KIAA1132 protein                                                                                        | BAA86446 | 1.3 | 0.7 | 0.6 | 0.2 | 1,034 | 898    | 1,037  | 648   |
| Incyte EST                                                                                              | N.A.     | 1.7 | 0.5 | 0.4 | 0.2 | 1,144 | 675    | 696    | 591   |
| Incyte EST                                                                                              | N.A.     | 2.1 | 1.0 | 0.3 | 0.1 | 2,303 | 1,218  | 890    | 634   |
| Incyte EST                                                                                              | N.A.     | 0.3 | 1.1 | 0.5 | 0.1 | 480   | 641    | 622    | 523   |
| Rat purine-selective sodium/nucleoside cotransporter (rCNT2) mRNA, complete cds                         | U66723   | 0.3 | 0.8 | 0.8 | 0.2 | 1,360 | 3,681  | 5,531  | 1,299 |
| Rat glycoprotein CD44 (CD44) mRNA, complete cds                                                         | M61875   | 0.1 | 0.6 | 0.4 | 0.1 | 472   | 933    | 797    | 564   |
| Rat differentiation-associated Na-dependent inorganic phosphate cotransporter (DNPI) mRNA, complete cds | AF271235 | 0.1 | 1.0 | 0.4 | 0.1 | 1,153 | 5,100  | 3,252  | 1,463 |
| Rat guanine nucleotide binding protein $\gamma$ subunit 11 mRNA, complete cds                           | AF257110 | 0.3 | 0.7 | 0.2 | 0.1 | 765   | 1,214  | 802    | 731   |
| Rat Ninj2 mRNA for ninjurin2, complete cds                                                              | AB040815 | 0.7 | 0.7 | 0.5 | 0.2 | 1,080 | 1,225  | 1,331  | 742   |

|                                                                                                                   |          |     |     |     |     |       |       |        |       |
|-------------------------------------------------------------------------------------------------------------------|----------|-----|-----|-----|-----|-------|-------|--------|-------|
| Incyte EST                                                                                                        | N.A.     | 0.4 | 0.4 | 0.1 | 0.1 | 966   | 1,172 | 809    | 684   |
| Incyte EST                                                                                                        | N.A.     | 0.6 | 0.3 | 0.2 | 0.1 | 2,266 | 1,701 | 1,464  | 1,236 |
| LOMP protein                                                                                                      | AAD33924 | 0.5 | 0.2 | 0.1 | 0.1 | 5,501 | 2,675 | 2,326  | 1,340 |
| Mouse carbonic anhydrase VII (Car7) mRNA, partial cds                                                             | AF291660 | 0.5 | 0.4 | 0.1 | 0.1 | 778   | 848   | 746    | 685   |
| Incyte EST                                                                                                        | N.A.     | 0.3 | 0.4 | 0.6 | 0.1 | 629   | 835   | 1,469  | 705   |
| CG2221 gene product                                                                                               | AAF46578 | 0.4 | 0.4 | 0.6 | 0.1 | 1,629 | 2,041 | 3,843  | 1,107 |
| Incyte EST                                                                                                        | N.A.     | 0.2 | 0.4 | 0.8 | 0.1 | 678   | 1,298 | 2,752  | 632   |
| Incyte EST                                                                                                        | N.A.     | 0.3 | 0.5 | 0.5 | 0.1 | 1,936 | 3,881 | 6,372  | 1,217 |
| Mouse calcium- and diacylglycerol-regulated guanine nucleotide exchange factor I (CalDAG-GEFI) mRNA, complete cds | U78171   | 0.3 | 0.7 | 0.7 | 0.1 | 1,140 | 2,145 | 3,050  | 765   |
| Incyte EST                                                                                                        | N.A.     | 0.3 | 0.4 | 0.5 | 0.1 | 817   | 1,022 | 1,479  | 688   |
| Incyte EST                                                                                                        | N.A.     | 0.7 | 0.5 | 0.4 | 0.1 | 1,945 | 1,792 | 2,476  | 947   |
| Incyte EST                                                                                                        | N.A.     | 0.6 | 0.4 | 0.4 | 0.1 | 1,213 | 1,189 | 1,642  | 696   |
| Incyte EST                                                                                                        | N.A.     | 0.7 | 0.5 | 0.4 | 0.1 | 1,103 | 1,065 | 1,304  | 610   |
| Rat mRNA for scrapie responsive protein 1                                                                         | AJ132434 | 0.3 | 0.2 | 0.4 | 0.1 | 650   | 690   | 1,261  | 573   |
| aldo-keto reductase a                                                                                             | AAF42808 | 0.2 | 0.2 | 0.4 | 0.1 | 787   | 827   | 1,405  | 602   |
| Incyte EST                                                                                                        | N.A.     | 0.4 | 0.2 | 0.4 | 0.1 | 1,166 | 800   | 1,842  | 659   |
| Mouse brain cDNA, clone MNCb-7013, similar to Mouse (Mus musculus) potassium channel Kv4.2 mRNA                   | AB045326 | 0.3 | 0.3 | 0.5 | 0.1 | 1,173 | 1,736 | 3,768  | 980   |
| Incyte EST                                                                                                        | N.A.     | 0.4 | 0.4 | 0.8 | 0.1 | 5,795 | 6,771 | 21,894 | 2,993 |
| Rat mRNA for monocarboxylate transporter MCT2                                                                     | X97445   | 0.3 | 0.3 | 0.4 | 0.1 | 1,890 | 2,082 | 3,654  | 1,328 |
| Rat Apo D mRNA.                                                                                                   | X55572   | 0.4 | 0.5 | 0.2 | 0.1 | 3,806 | 5,396 | 4,213  | 1,638 |
| Rat mRNA for transferrin, complete cds                                                                            | D38380   | 0.3 | 0.4 | 0.2 | 0.1 | 7,627 | 8,892 | 8,531  | 2,606 |
| Rat mRNA for Myelin-associated/Oligodendrocytic Basic Protein-81                                                  | X89637   | 0.2 | 0.2 | 0.1 | 0.0 | 2,010 | 2,283 | 2,340  | 894   |
| Rat putative G-protein coupled receptor GPCR91 (Gpcr91) mRNA, complete cds                                        | AF090347 | 0.2 | 0.2 | 0.1 | 0.0 | 2,978 | 2,795 | 3,508  | 1,197 |
| Incyte EST                                                                                                        | N.A.     | 0.2 | 0.2 | 0.2 | 0.0 | 1,542 | 1,960 | 2,060  | 792   |
| Rat mRNA for carbonic anhydrase II                                                                                | X58294   | 0.2 | 0.2 | 0.1 | 0.0 | 3,369 | 3,996 | 4,765  | 1,222 |
| Incyte EST                                                                                                        | N.A.     | 0.4 | 0.4 | 0.3 | 0.1 | 3,188 | 3,791 | 4,181  | 1,596 |
| Incyte EST                                                                                                        | N.A.     | 0.2 | 0.1 | 0.0 | 0.0 | 1,079 | 954   | 804    | 567   |



|                                                                              |          |     |     |     |     |       |       |        |       |
|------------------------------------------------------------------------------|----------|-----|-----|-----|-----|-------|-------|--------|-------|
| Incyte EST                                                                   | N.A.     | 0.3 | 0.3 | 0.2 | 0.1 | 2,007 | 2,338 | 3,086  | 881   |
| Mouse apoptosis-related RNA binding protein (Napor-3) mRNA, complete cds     | AF090697 | 0.5 | 0.5 | 0.4 | 0.1 | 4,569 | 5,195 | 7,149  | 1,471 |
| Incyte EST                                                                   | N.A.     | 0.2 | 0.4 | 0.3 | 0.0 | 1,948 | 3,848 | 5,033  | 1,040 |
| Rat mRNA for phosphodiesterase I                                             | D28560   | 0.3 | 0.4 | 0.4 | 0.1 | 3,805 | 5,847 | 9,894  | 1,903 |
| Mouse oligodendrocyte-specific protein mRNA, complete cds                    | U19582   | 0.4 | 0.4 | 0.3 | 0.1 | 7,438 | 7,880 | 11,306 | 2,264 |
| Incyte EST                                                                   | N.A.     | 0.5 | 0.5 | 0.4 | 0.1 | 2,600 | 2,700 | 3,767  | 1,487 |
| Incyte EST                                                                   | N.A.     | 0.5 | 0.5 | 0.4 | 0.1 | 2,683 | 3,063 | 3,891  | 1,382 |
| Incyte EST                                                                   | N.A.     | 0.4 | 0.4 | 0.3 | 0.0 | 4,067 | 6,250 | 5,747  | 1,153 |
| Mouse mRNA for CA XIV, complete cds                                          | AB005450 | 0.4 | 0.5 | 0.3 | 0.1 | 1,598 | 2,171 | 1,849  | 894   |
| Mouse mRNA for CA XIV, complete cds                                          | AB005450 | 0.4 | 0.5 | 0.2 | 0.1 | 1,296 | 1,859 | 1,673  | 690   |
| Incyte EST                                                                   | N.A.     | 0.4 | 0.4 | 0.3 | 0.1 | 2,273 | 2,435 | 2,588  | 1,055 |
| Rattus norvegicus cDNA clone UI-R-DKO-cea-c-05-0-UI 3'                       | BI294233 | 0.1 | 0.3 | 0.2 | 0.0 | 594   | 1,554 | 1,401  | 613   |
| Mouse FKBP65RS mRNA, complete cds                                            | AF279263 | 0.4 | 1.0 | 0.2 | 0.1 | 2,014 | 6,192 | 2,113  | 1,117 |
| Mouse ecotropic viral integration site 9 isoform C (Evi9) mRNA, complete cds | AF169037 | 0.3 | 0.6 | 0.1 | 0.1 | 626   | 1,114 | 722    | 535   |
| Rat Drosophila polarity gene (frizzled) homologue mRNA, complete cds         | L02529   | 0.3 | 0.8 | 0.1 | 0.1 | 1,712 | 4,144 | 1,406  | 992   |
| Rat Drosophila polarity gene (frizzled) homologue mRNA, complete cds         | L02529   | 0.4 | 1.1 | 0.2 | 0.1 | 717   | 1,661 | 797    | 617   |
| INCYTE EST                                                                   | N.A.     | 0.2 | 0.7 | 0.1 | 0.0 | 1,037 | 2,876 | 917    | 715   |
| Incyte EST                                                                   | N.A.     | 0.5 | 0.8 | 0.3 | 0.1 | 1,070 | 1,397 | 919    | 768   |
| Mouse osf-2 mRNA for osteoblast specific factor 2, complete cds              | D13664   | 0.5 | 1.0 | 0.3 | 0.1 | 754   | 1,069 | 822    | 566   |
| Incyte EST                                                                   | N.A.     | 0.6 | 0.7 | 0.2 | 0.1 | 1,956 | 2,058 | 1,320  | 1,075 |
| Incyte EST                                                                   | N.A.     | 0.9 | 0.9 | 0.2 | 0.1 | 1,665 | 1,701 | 790    | 671   |
| bK984G1.1 (supported by FGENES)                                              | CAB41538 | 1.2 | 0.8 | 0.1 | 0.1 | 3,948 | 3,252 | 1,245  | 963   |
| Incyte EST                                                                   | N.A.     | 0.8 | 0.5 | 0.1 | 0.1 | 1,863 | 1,827 | 806    | 688   |
| Mouse zinc finger protein (Mtsh1) mRNA, partial cds                          | AF191309 | 0.7 | 0.8 | 0.4 | 0.2 | 2,878 | 4,239 | 3,327  | 1,759 |
| Incyte EST                                                                   | N.A.     | 0.6 | 0.5 | 0.1 | 0.0 | 5,089 | 5,695 | 2,740  | 1,032 |
| Incyte EST                                                                   | N.A.     | 1.3 | 0.6 | 0.2 | 0.0 | 4,208 | 3,480 | 1,786  | 720   |
| hypothetical protein                                                         | CAB53247 | 0.9 | 1.0 | 0.2 | 0.1 | 1,880 | 2,567 | 1,264  | 867   |
| Incyte EST                                                                   | N.A.     | 1.0 | 1.0 | 0.2 | 0.1 | 2,720 | 3,488 | 1,512  | 1,042 |

|                                                                               |           |     |     |     |     |        |        |        |       |
|-------------------------------------------------------------------------------|-----------|-----|-----|-----|-----|--------|--------|--------|-------|
| Mouse nuclear LIM-only 4 protein (Lmo4) mRNA, complete cds                    | AF102817  | 1.0 | 1.2 | 0.1 | 0.1 | 7,228  | 10,381 | 2,784  | 2,075 |
| Mouse mRNA encoding lysine-ketoglutarate reductase/saccharopine dehydrogenase | AJ224761  | 1.2 | 1.3 | 0.3 | 0.1 | 2,425  | 2,728  | 1,147  | 763   |
| Mouse ATP-binding cassette protein (Abca8) mRNA, partial cds                  | AF213393  | 0.6 | 1.7 | 0.2 | 0.1 | 4,484  | 11,963 | 2,715  | 1,055 |
| RasGAP-related protein                                                        | AAB37765  | 0.5 | 0.6 | 0.1 | 0.1 | 1,693  | 1,996  | 954    | 787   |
| Incyte EST                                                                    | N.A.      | 0.8 | 0.7 | 0.4 | 0.1 | 921    | 913    | 1,006  | 713   |
| Mouse groucho-related protein (Grg2) mRNA, complete cds                       | AF145958  | 0.8 | 1.0 | 0.7 | 0.2 | 4,425  | 5,155  | 6,266  | 2,409 |
| Rat protein kinase C $\epsilon$ subspecies                                    | M18331    | 1.1 | 1.2 | 0.5 | 0.1 | 10,741 | 15,182 | 12,524 | 1,712 |
| Rat protein kinase C-binding protein NELL2 mRNA, complete cds                 | U48245    | 0.9 | 1.0 | 0.5 | 0.2 | 5,681  | 7,975  | 7,542  | 2,853 |
| Rat protein kinase C-binding protein NELL2 mRNA, complete cds                 | U48245    | 0.9 | 1.1 | 0.3 | 0.1 | 8,634  | 9,971  | 6,416  | 1,635 |
| Mouse mRNA for protein kinase C, complete cds                                 | D11091    | 0.9 | 0.7 | 0.4 | 0.2 | 4,259  | 3,404  | 3,114  | 1,904 |
| Rat PKC theta mRNA, partial cds                                               | AB020614  | 0.9 | 0.7 | 0.4 | 0.2 | 5,109  | 4,029  | 3,591  | 1,951 |
| tuftelin                                                                      | AAC04577  | 0.3 | 1.6 | 0.4 | 0.2 | 616    | 1,160  | 885    | 668   |
| Rat lipoprotein lipase mRNA, complete cds                                     | L03294    | 0.1 | 2.0 | 0.1 | 0.0 | 819    | 7,556  | 1,170  | 704   |
| Rat cell adhesion regulator (CAR1) mRNA, complete cds                         | U76714    | 0.2 | 0.6 | 0.1 | 0.1 | 978    | 1,954  | 966    | 876   |
| Rat mRNA for leukosialin                                                      | Y00090    | 0.3 | 0.9 | 0.2 | 0.1 | 714    | 967    | 611    | 602   |
| Rat CDK108 mRNA.                                                              | Y17328    | 0.0 | 0.9 | 0.1 | 0.0 | 785    | 11,217 | 1,972  | 1,194 |
| Rat glia-derived nexin (GDN) mRNA, 5' end                                     | M17784    | 1.1 | 0.4 | 0.5 | 0.2 | 12,403 | 6,347  | 11,164 | 5,221 |
| Rat osteoactivin mRNA, complete cds                                           | AF184983  | 1.0 | 0.2 | 0.4 | 0.2 | 1,566  | 839    | 1,378  | 908   |
| Rat protein kinase C $\delta$ subspecies                                      | M18330    | 0.9 | 0.2 | 0.1 | 0.1 | 2,593  | 1,085  | 1,101  | 932   |
| DNA polymerase eta                                                            | AAD05272  | 0.4 | 0.3 | 1.2 | 0.1 | 455    | 453    | 610    | 494   |
| INCYTE EST                                                                    | N.A.      | 0.4 | 0.3 | 1.8 | 0.1 | 1,332  | 1,274  | 8,772  | 966   |
| Rat Sam68-like protein SLM-2 (Slm-2) mRNA, complete cds                       | AF152547  | 0.5 | 0.4 | 1.4 | 0.2 | 1,176  | 1,429  | 5,360  | 992   |
| HOMEBOX PROTEIN SIX3                                                          | NM_023990 | 0.2 | 0.1 | 2.4 | 0.0 | 606    | 593    | 4,685  | 551   |
| Rat mRNA for Mac-MARCKS protein (F52 gene)                                    | AJ301677  | 0.3 | 0.7 | 1.4 | 0.1 | 2,259  | 5,182  | 15,389 | 1,516 |
| Rat phospholipase C- $\beta$ 1b mRNA, complete sequence                       | L14323    | 0.4 | 0.6 | 1.5 | 0.1 | 5,004  | 9,840  | 31,108 | 3,388 |
| Rat phospholipase C- $\beta$ 1b mRNA, complete sequence                       | L14323    | 0.4 | 0.6 | 1.7 | 0.1 | 5,652  | 9,443  | 30,123 | 3,697 |
| Incyte EST (similar to gad65)                                                 | N.A.      | 0.4 | 0.3 | 3.1 | 0.0 | 3,001  | 3,525  | 28,428 | 892   |
| Rat mRNA for atypical PKC specific binding protein, complete cds              | AB005549  | 0.4 | 0.4 | 1.3 | 0.2 | 1,999  | 2,113  | 8,409  | 1,838 |

|                                                                                         |          |     |     |     |     |       |       |        |       |
|-----------------------------------------------------------------------------------------|----------|-----|-----|-----|-----|-------|-------|--------|-------|
| Rat basic transcription element binding protein 2 (Bteb2) mRNA, complete cds            | AF182101 | 0.5 | 0.5 | 1.9 | 0.2 | 573   | 625   | 1,697  | 618   |
| Rat PV-1 mRNA, complete cds                                                             | AF154831 | 0.4 | 0.3 | 1.5 | 0.2 | 600   | 614   | 1,972  | 702   |
| Mouse homeobox protein Lim1 (Lim1) exons 1-4, complete sequence                         | AF039705 | 0.3 | 0.2 | 2.1 | 0.2 | 1,462 | 1,220 | 11,946 | 1,509 |
| Mouse prospero-related homeobox 1 (Prox1) mRNA, complete cds                            | AF061576 | 0.5 | 0.4 | 1.0 | 0.1 | 521   | 591   | 775    | 544   |
| KIAA1613 protein similar to cationic amino acid transporter                             | BAB13439 | 0.1 | 0.3 | 2.6 | 0.7 | 789   | 2,097 | 17,214 | 6,591 |
| Incyte EST                                                                              | N.A.     | 0.2 | 0.3 | 1.6 | 0.7 | 506   | 646   | 1,972  | 1,206 |
| Incyte EST                                                                              | N.A.     | 0.1 | 0.2 | 1.6 | 0.5 | 982   | 1,535 | 14,521 | 5,059 |
| Mouse mRNA for forkhead protein FKHR (Fkhr gene)                                        | AJ252157 | 0.1 | 0.2 | 1.1 | 0.4 | 910   | 1,794 | 10,900 | 4,124 |
| cDNA clone similar to voltage-dependent calcium channel, $\alpha$ 11 subunit            | BE095865 | 0.1 | 0.2 | 1.3 | 0.3 | 521   | 907   | 4,087  | 1,192 |
| Incyte EST                                                                              | N.A.     | 0.2 | 0.6 | 1.2 | 0.6 | 799   | 1,675 | 3,702  | 2,165 |
| tetraspan TM4SF; Tspan-1                                                                | AAC69714 | 0.2 | 0.3 | 1.1 | 0.4 | 1,283 | 1,492 | 7,594  | 2,833 |
| Mouse partial mRNA for stretch response protein 553 (sr553 gene)                        | AJ250188 | 0.2 | 0.2 | 1.4 | 0.2 | 473   | 581   | 1,885  | 658   |
| Rat mRNA for glutamic acid decarboxylase                                                | X57573   | 0.1 | 0.0 | 1.3 | 0.1 | 1,484 | 1,593 | 32,716 | 1,942 |
| Mouse zinc transporter ZnT-3 (ZnT-3) mRNA, complete cds                                 | U76007   | 0.0 | 0.0 | 1.7 | 0.0 | 737   | 994   | 19,632 | 1,088 |
| Mouse gene for Arx homeodomain protein, exon 5 and complete cds                         | AB026674 | 0.0 | 0.1 | 5.9 | 0.0 | 472   | 657   | 16,661 | 553   |
| Mouse mRNA, one isoform of PTP-RL9                                                      | D83204   | 0.1 | 0.1 | 0.4 | 0.1 | 1,050 | 959   | 4,393  | 1,035 |
| Incyte EST                                                                              | N.A.     | 0.1 | 0.1 | 1.0 | 0.0 | 924   | 978   | 9,044  | 979   |
| Incyte EST                                                                              | N.A.     | 0.1 | 0.2 | 0.5 | 0.1 | 481   | 724   | 1,994  | 615   |
| Incyte EST                                                                              | N.A.     | 0.2 | 0.3 | 0.8 | 0.1 | 757   | 1,180 | 3,493  | 1,008 |
| Rat mRNA encoding rat pre-prosomatostatin (isolated from a medullary thyroid carcinoma) | V01271   | 0.1 | 0.1 | 0.4 | 0.1 | 496   | 721   | 1,863  | 634   |
| Incyte EST                                                                              | N.A.     | 0.1 | 0.2 | 0.8 | 0.1 | 587   | 920   | 3,619  | 988   |
| Incyte EST                                                                              | N.A.     | 0.1 | 0.1 | 0.5 | 0.1 | 1,042 | 1,198 | 7,207  | 1,267 |
| Incyte EST                                                                              | N.A.     | 0.1 | 0.3 | 0.6 | 0.1 | 485   | 637   | 1,146  | 556   |
| Incyte EST                                                                              | N.A.     | 0.1 | 0.1 | 0.4 | 0.0 | 1,087 | 1,635 | 7,265  | 957   |
| Incyte EST                                                                              | N.A.     | 0.1 | 0.2 | 0.6 | 0.1 | 1,351 | 2,632 | 8,411  | 1,923 |
| Incyte EST                                                                              | N.A.     | 0.2 | 0.4 | 0.8 | 0.2 | 1,429 | 3,031 | 7,906  | 2,012 |
| Incyte EST                                                                              | N.A.     | 0.2 | 0.4 | 0.8 | 0.2 | 2,589 | 6,002 | 17,101 | 3,635 |
| Incyte EST                                                                              | N.A.     | 0.3 | 0.4 | 1.1 | 0.2 | 636   | 763   | 1,717  | 697   |

|                                                                                          |          |     |     |     |     |       |       |        |       |
|------------------------------------------------------------------------------------------|----------|-----|-----|-----|-----|-------|-------|--------|-------|
| Incyte EST                                                                               | N.A.     | 0.3 | 0.2 | 0.9 | 0.1 | 558   | 572   | 1,225  | 531   |
| Rat insulin-like growth factor binding protein 5 mRNA, 3' UTR                            | AF139830 | 0.2 | 0.6 | 1.7 | 0.2 | 1,299 | 4,341 | 15,354 | 2,715 |
| Incyte EST no sequence homology                                                          | N.A.     | 0.1 | 0.4 | 1.1 | 0.2 | 1,592 | 5,963 | 20,574 | 3,542 |
| Rat neuropilin mRNA, complete cds                                                        | AF016296 | 0.1 | 0.3 | 0.8 | 0.1 | 479   | 1,002 | 2,334  | 758   |
| Mouse COUP-TF1                                                                           | X74134   | 0.1 | 0.1 | 0.3 | 0.1 | 906   | 1,331 | 5,352  | 1,387 |
| Mouse zic mRNA for Zic protein, complete cds                                             | D32167   | 0.0 | 0.0 | 0.1 | 0.0 | 517   | 593   | 3,210  | 1,327 |
| Incyte EST                                                                               | N.A.     | 0.1 | 0.1 | 0.5 | 0.2 | 560   | 761   | 2,518  | 1,033 |
| Mouse ets-related protein 81 (ER81) mRNA, complete cds                                   | L10426   | 0.1 | 0.1 | 0.5 | 0.2 | 1,337 | 2,035 | 13,013 | 3,582 |
| Rat ryanodine receptor type 2 mRNA, partial cds                                          | AF112257 | 0.1 | 0.1 | 0.4 | 0.2 | 525   | 587   | 1,590  | 1,125 |
| Incyte EST                                                                               | N.A.     | 0.0 | 0.1 | 0.3 | 0.1 | 551   | 834   | 3,067  | 1,474 |
| Incyte EST                                                                               | N.A.     | 0.0 | 0.1 | 0.2 | 0.2 | 952   | 2,201 | 5,187  | 4,923 |
| Incyte EST                                                                               | N.A.     | 0.0 | 0.1 | 0.2 | 0.2 | 1,000 | 2,401 | 5,077  | 5,544 |
| Incyte EST                                                                               | N.A.     | 0.0 | 0.1 | 0.2 | 0.2 | 574   | 839   | 1,856  | 1,896 |
| Rat nerve growth factor-induced (NGFI-A) gene, complete cds                              | M18416   | 0.0 | 0.1 | 0.1 | 0.0 | 582   | 1,382 | 3,329  | 1,307 |
| Incyte EST                                                                               | N.A.     | 0.2 | 0.3 | 0.8 | 0.6 | 2,148 | 3,864 | 13,370 | 9,576 |
| Incyte EST                                                                               | N.A.     | 0.1 | 0.1 | 0.5 | 0.5 | 697   | 934   | 3,860  | 3,633 |
| Incyte EST                                                                               | N.A.     | 0.1 | 0.2 | 0.4 | 0.4 | 1,301 | 1,903 | 6,324  | 5,849 |
| Incyte EST                                                                               | N.A.     | 0.1 | 0.2 | 0.5 | 0.4 | 543   | 912   | 1,627  | 1,713 |
| Incyte EST                                                                               | N.A.     | 0.1 | 0.1 | 0.4 | 0.3 | 900   | 1,309 | 5,927  | 4,184 |
| Cricetinae gen. sp. insulin receptor tyrosine kinase 53 kDa substrate mRNA, complete cds | U41899   | 0.1 | 0.1 | 0.4 | 0.4 | 762   | 1,248 | 5,369  | 4,763 |
| Mouse hormonally upregulated neu tumor-associated kinase (Hunk) mRNA, complete cds       | AF167987 | 0.1 | 0.1 | 0.6 | 0.3 | 544   | 864   | 2,691  | 1,476 |
| Incyte EST                                                                               | N.A.     | 0.1 | 0.1 | 0.8 | 0.3 | 596   | 759   | 3,050  | 1,407 |
| Mouse mSox5L mRNA, complete cds                                                          | AB006330 | 0.1 | 0.2 | 0.7 | 0.3 | 814   | 1,277 | 8,197  | 3,238 |
| Mouse mSox5L mRNA, complete cds                                                          | AB006330 | 0.1 | 0.2 | 0.8 | 0.3 | 858   | 1,362 | 8,571  | 3,047 |
| Incyte EST                                                                               | N.A.     | 0.5 | 0.3 | 2.3 | 0.3 | 512   | 513   | 1,361  | 629   |
| Rat IgE binding protein mRNA, complete cds                                               | J02962   | 0.3 | 0.2 | 2.2 | 0.5 | 698   | 756   | 5,134  | 1,544 |
| Mouse mRNA for K-glypican                                                                | X83577   | 0.1 | 2.3 | 0.3 | 0.3 | 697   | 4,966 | 1,567  | 1,459 |
| Mouse mRNA for entactin                                                                  | X14194   | 0.1 | 2.1 | 0.3 | 0.6 | 545   | 2,745 | 982    | 1,335 |

|                                                                                                     |           |     |     |     |     |       |       |       |        |
|-----------------------------------------------------------------------------------------------------|-----------|-----|-----|-----|-----|-------|-------|-------|--------|
| Rattus norvegicus chloride intracellular channel 5 (Clic5), mRNA, NM_053603                         | NM_053603 | 0.2 | 1.3 | 0.6 | 0.6 | 534   | 1,642 | 1,321 | 1,165  |
| Rattus norvegicus cDNA clone UI-R-DR0-cjc-g-03-0-UI 3'                                              | BI303966  | 0.1 | 0.7 | 0.6 | 0.5 | 507   | 1,378 | 1,633 | 1,385  |
| Rat synaptotagmin interacting protein STIP2 mRNA, complete cds.= neuronal calcium binding protein 2 | AF193757  | 0.2 | 1.3 | 1.3 | 0.3 | 752   | 3,398 | 5,210 | 1,454  |
| Rat testis-specific histone H1t and histone H4t, complete cds                                       | M28409    | 1.0 | 0.3 | 0.2 | 0.6 | 4,937 | 2,475 | 2,630 | 5,642  |
| Rat Sprague-Dawley N-methyl-D-aspartate receptor NMDAR2C subunit mRNA, complete cds                 | U08259    | 0.7 | 0.1 | 0.2 | 0.3 | 3,986 | 1,262 | 2,329 | 2,687  |
| Incyte EST                                                                                          | N.A.      | 1.0 | 0.1 | 0.1 | 0.2 | 1,843 | 644   | 665   | 1,094  |
| Mouse mRNA for uracil-DNA glycosylase                                                               | X99018    | 1.4 | 0.4 | 0.2 | 0.8 | 829   | 589   | 576   | 866    |
| Incyte EST                                                                                          | N.A.      | 1.4 | 0.4 | 0.3 | 0.3 | 846   | 581   | 605   | 638    |
| Incyte EST                                                                                          | N.A.      | 0.4 | 0.6 | 0.2 | 1.1 | 590   | 1,019 | 669   | 1,591  |
| Rat mRNA for HB2, complete cds                                                                      | AB008538  | 0.4 | 0.9 | 0.2 | 0.4 | 2,097 | 5,109 | 1,773 | 3,924  |
| Mouse c-kit mRNA for truncated tyrosine-kinase                                                      | X65997    | 0.5 | 0.4 | 0.1 | 0.4 | 1,904 | 2,169 | 1,166 | 2,925  |
| Mouse c-kit mRNA for truncated tyrosine-kinase.                                                     | X65997    | 0.4 | 0.4 | 0.1 | 0.4 | 2,698 | 3,368 | 1,481 | 3,542  |
| Mouse mRNA, up-regulated by FUS-ERG, 3' region, cDNA fragment: C14G220                              | AB028209  | 0.5 | 0.5 | 0.1 | 0.4 | 4,314 | 4,342 | 2,218 | 5,663  |
| Mouse renal munc13 mRNA, complete cds                                                               | AF115848  | 0.7 | 0.8 | 0.2 | 0.4 | 2,442 | 2,883 | 1,405 | 2,771  |
| Rat KCNMB4 mRNA for calcium activated potassium channel $\beta$ 4 subunit, complete cds             | AB050637  | 0.7 | 0.7 | 0.1 | 0.6 | 3,014 | 4,342 | 1,717 | 4,872  |
| Incyte EST                                                                                          | N.A.      | 0.9 | 1.1 | 0.1 | 0.5 | 2,866 | 4,023 | 1,293 | 2,926  |
| calmodulin                                                                                          | AAD56955  | 0.1 | 0.2 | 0.1 | 0.2 | 485   | 818   | 591   | 983    |
| Incyte EST                                                                                          | N.A.      | 0.3 | 0.2 | 0.1 | 0.5 | 755   | 694   | 572   | 1,997  |
| Rat RIM binding protein 2 (Rbp2) mRNA, partial cds                                                  | AF199336  | 1.0 | 0.6 | 0.2 | 1.4 | 915   | 752   | 608   | 1,802  |
| Incyte EST                                                                                          | N.A.      | 0.6 | 0.8 | 0.2 | 1.2 | 5,989 | 7,613 | 4,303 | 15,103 |
| Incyte EST                                                                                          | N.A.      | 0.7 | 0.5 | 0.1 | 1.2 | 1,653 | 1,565 | 922   | 4,386  |
| Incyte EST                                                                                          | N.A.      | 1.5 | 0.9 | 0.2 | 1.1 | 2,636 | 2,150 | 882   | 3,414  |
| Incyte EST                                                                                          | N.A.      | 1.5 | 0.9 | 0.1 | 0.9 | 774   | 721   | 555   | 966    |
| 239FB gene product                                                                                  | AAC50564  | 1.3 | 1.3 | 0.2 | 1.1 | 1,734 | 2,981 | 1,114 | 2,695  |

Genes were filtered based on their expression level relative to the whole-brain reference (>4-fold higher or lower in at least 3 of 16 experiments) and transcripts with significant differences in expression between at least two cell groups were selected by multiclass SAM with a false-discovery rate of <1%. The resulting set of 534 genes and the experimental samples were grouped

based on their similarities of gene expression by two-dimensional hierarchical clustering (Pearson correlation, average linkage). Abbreviations: CA, catecholaminergic; LC, locus coeruleus; SN, substantia nigra; VTA, ventral tegmental area.
