# Supplementary material
Source: PubMed Central journal article supplement (PMC518849)
Supplement: pnas_101_38_13891__3.pdf [file pnas_101_38_13891__3.pdf]

**Table 3. Differential gene expression between SN and VTA neurons**

| Gene name                                                                                                               | Genebank Accession | RATIO SN | RATIO VTA | RATIO A13 | RATIO LC | Mean signal SN | Mean signal VTA | Mean signal A13 | Mean signal LC |
|-------------------------------------------------------------------------------------------------------------------------|--------------------|----------|-----------|-----------|----------|----------------|-----------------|-----------------|----------------|
| Wnt2: wingless-type MMTV integration site 2                                                                             | AK045120           | 2.5      | 9.3       | 0.1       | 1.6      | 2,644          | 7,864           | 682             | 3,536          |
| Incyte EST                                                                                                              | N.A.               | 2.0      | 4.5       | 1.5       | 1.9      | 6,350          | 15,348          | 8,202           | 9,110          |
| unnamed protein product                                                                                                 | BAB14897           | 3.3      | 7.8       | 3.8       | 2.5      | 4,627          | 12,327          | 10,338          | 6,127          |
| Mouse lysyl hydroxylase isoform 2 mRNA, complete cds                                                                    | AF080572           | 4.4      | 19.1      | 0.8       | 1.9      | 3,358          | 12,871          | 1,388           | 2,631          |
| Mouse NMRI fibroglycan (syndecan-2) gene, complete cds                                                                  | U00674             | 3.1      | 8.7       | 1.9       | 1.5      | 14,836         | 33,370          | 17,834          | 16,066         |
| Rat core protein (HSPG) mRNA, complete cds. =syndecan 2                                                                 | M81687             | 3.4      | 8.8       | 2.0       | 1.7      | 2,213          | 5,022           | 2,250           | 2,244          |
| Rat serine protease RNK-Met-1 mRNA, complete cds                                                                        | L05175             | 1.8      | 4.7       | 0.8       | 0.6      | 3,220          | 8,632           | 3,201           | 2,314          |
| solute carrier family 39 (zinc transporter), member 4 (ZIP-4)                                                           | BQ196656           | 103.6    | 265.6     | 1.6       | 1.4      | 13,954         | 31,245          | 1,208           | 1,017          |
| bA524D16A.1 (sushi-repeat-containing protein)                                                                           | CAC16060           | 12.5     | 37.1      | 1.2       | 1.3      | 1,879          | 5,096           | 723             | 734            |
| Rat kidney extracellular calcium-sensing receptor mRNA, complete cds                                                    | U10354             | 0.9      | 16.8      | 0.9       | 0.2      | 597            | 2,851           | 794             | 533            |
| Rattus norvegicus cDNA clone UI-R-BT1-akv-g-05-0-UI 3'                                                                  | AW531194           | 1.1      | 3.5       | 7.3       | 6.0      | 639            | 985             | 1,995           | 1,740          |
| Mouse C1q-related factor mRNA, complete cds                                                                             | AF095155           | 1.2      | 3.3       | 4.8       | 7.5      | 1,110          | 2,486           | 4,284           | 5,419          |
| Rat vanilloid receptor splice variant mRNA, complete cds                                                                | AF158248           | 1.0      | 3.8       | 1.1       | 1.6      | 514            | 914             | 666             | 795            |
| Rat mRNA for Castration Induced Prostatic Apoptosis Related protein-1 (CIPAR-1)                                         | AJ010750           | 1.0      | 5.0       | 7.4       | 1.2      | 1,165          | 5,322           | 11,583          | 2,261          |
| hypothetical protein                                                                                                    | CAB94883           | 0.7      | 4.1       | 0.4       | 0.4      | 534            | 1,258           | 626             | 602            |
| Mouse myristoylated alanine-rich C-kinase substrate (MARCKS) mRNA, complete cds                                         | M60474             | 0.9      | 2.2       | 2.7       | 1.1      | 3,366          | 8,864           | 15,566          | 7,533          |
| Incyte EST                                                                                                              | N.A.               | 0.9      | 1.7       | 0.6       | 0.4      | 4,357          | 9,184           | 5,567           | 3,837          |
| Rattus norvegicus cDNA clone UI-R-DK0-ceq-g-09-0-UI 3' similar to hypothetical protein DKFZp564B1162 with RHOGAP domain | BI295380           | 0.9      | 2.0       | 1.5       | 4.1      | 2,178          | 5,041           | 5,428           | 11,832         |
| Mouse bone morphogenetic protein 2 (BMP-2) gene, complete cds                                                           | L25602             | 1.2      | 3.8       | 0.2       | 1.5      | 1,358          | 3,393           | 743             | 2,520          |
| Rat bone morphogenetic protein 2 related mRNA sequence                                                                  | L20678             | 1.0      | 2.6       | 0.3       | 1.4      | 554            | 908             | 511             | 896            |
| Incyte EST                                                                                                              | N.A.               | 0.9      | 2.5       | 2.1       | 1.1      | 1,028          | 2,382           | 2,901           | 1,914          |
| Rat follistatin gene, exon 6, clones pROF(301-305)                                                                      | M31591             | 0.6      | 10.5      | 1.9       | 0.4      | 540            | 2,744           | 1,123           | 642            |
| axonemal dynein heavy chain                                                                                             | CAB94756           | 1.0      | 2.6       | 1.0       | 4.0      | 915            | 1,937           | 1,451           | 4,044          |
| Mouse Ephrin B3                                                                                                         | AK048305           | 0.9      | 3.1       | 3.6       | 1.0      | 2,090          | 6,658           | 10,668          | 3,990          |

|                                                                                                                                                                     |           |      |      |      |      |        |        |        |        |
|---------------------------------------------------------------------------------------------------------------------------------------------------------------------|-----------|------|------|------|------|--------|--------|--------|--------|
| Rat gene for hepatocarcinogenesis-related transcription factor (HTF), complete cds                                                                                  | AB030238  | 1.1  | 2.2  | 1.1  | 1.2  | 3,672  | 9,453  | 8,873  | 8,484  |
| unnamed protein product                                                                                                                                             | BAA91922  | 1.3  | 3.5  | 0.2  | 0.4  | 2,680  | 6,151  | 1,421  | 1,551  |
| Rat phospholipase C $\gamma$ -2, complete cds                                                                                                                       | J05155    | 1.2  | 8.5  | 1.0  | 0.4  | 1,530  | 7,388  | 2,018  | 968    |
| Rat DRG Library Rattus norvegicus cDNA clone DRNBLF02 5'                                                                                                            | BG671101  | 1.2  | 5.3  | 11.0 | 1.8  | 6,359  | 21,966 | 42,331 | 15,662 |
| Myopodin protein                                                                                                                                                    | CAB51856  | 1.2  | 3.2  | 0.4  | 0.2  | 2,379  | 4,926  | 1,364  | 1,222  |
| Mouse mRNA for distal intestinal serine protease (DISP gene)                                                                                                        | AJ243866  | 1.4  | 4.4  | 0.8  | 2.0  | 501    | 655    | 587    | 685    |
| Rat huntingtin associated protein (rHAP1-B) mRNA, complete cds, alternatively spliced form                                                                          | U38370    | 1.3  | 3.7  | 8.2  | 5.5  | 12,898 | 26,823 | 47,599 | 41,910 |
| Rattus norvegicus cDNA clone UI-R-C0-hi-d-02-0-UI 3' similar to Necdin-like protein 1 and melanoma antigen, family L, 2 (Magel2), involved in Prader-Willi syndrome | AA996569  | 1.6  | 5.3  | 10.8 | 4.2  | 2,033  | 6,482  | 16,258 | 7,246  |
| Rat mRNA for novel gene expressed in circadian manner, clone SCN8                                                                                                   | X95850    | 1.3  | 3.0  | 0.5  | 1.2  | 2,355  | 5,323  | 2,268  | 3,561  |
| Rat $\alpha$ -1B adrenergic receptor mRNA, complete cds                                                                                                             | M60655    | 1.5  | 3.8  | 0.8  | 0.2  | 3,678  | 8,541  | 3,597  | 1,130  |
| Mouse mRNA for Rho guanine nucleotide-exchange factor, splice variant NET1A                                                                                         | AJ010045  | 1.2  | 2.6  | 0.3  | 0.3  | 9,435  | 17,062 | 4,035  | 4,052  |
| Mouse hepatocyte growth factor activator inhibitor type 2 splice variant 2 (Hai2) mRNA, complete cds                                                                | AF099020  | 1.1  | 2.6  | 2.9  | 1.1  | 3,806  | 9,383  | 14,244 | 5,518  |
| Rat pancreatic ribonuclease mRNA                                                                                                                                    | J00771    | 1.0  | 5.0  | 0.9  | 0.7  | 453    | 832    | 531    | 545    |
| palate, lung, and nasal epithelium expressed transcript (Plunc)                                                                                                     | U69172    | 0.6  | 9.1  | 6.7  | 5.3  | 454    | 1,346  | 1,146  | 1,043  |
| Mouse DNA for Gpx2 pseudogene                                                                                                                                       | X91864    | 51.0 | 13.3 | 1.3  | 2.8  | 3,589  | 1,892  | 721    | 963    |
| Rattus norvegicus cDNA clone UI-R-C0-gx-g-08-0-UI 3'                                                                                                                | AA964745  | 6.6  | 2.5  | 0.9  | 0.8  | 2,687  | 1,759  | 1,087  | 1,130  |
| Rat mRNA for sensory neuron synuclein                                                                                                                               | X86789    | 28.1 | 4.3  | 1.8  | 29.5 | 10,687 | 3,114  | 2,181  | 21,682 |
| Similar to retinoic acid-inducible orphan G-protein-coupled receptor GPRC5C                                                                                         | NM_181444 | 7.8  | 2.0  | 2.0  | 1.9  | 870    | 577    | 647    | 703    |
| INCYTE EST                                                                                                                                                          | N.A.      | 0.2  | 0.7  | 0.1  | 0.0  | 1,037  | 2,876  | 917    | 715    |
| Rat mRNA for fibromodulin.                                                                                                                                          | X82152    | 0.0  | 0.3  | 0.1  | 0.2  | 548    | 1,030  | 704    | 1,127  |
| Rattus norvegicus cDNA clone UI-R-DK0-cea-c-05-0-UI 3'                                                                                                              | BI294233  | 0.1  | 0.3  | 0.2  | 0.0  | 594    | 1,554  | 1,401  | 613    |
| cDNA clone similar to voltage-dependent calcium channel, $\alpha$ 11 subunit                                                                                        | BE095865  | 0.1  | 0.2  | 1.3  | 0.3  | 521    | 907    | 4,087  | 1,192  |
| KIAA1613 protein similar to cationic amino acid                                                                                                                     | BAB13439  | 0.1  | 0.3  | 2.6  | 0.7  | 789    | 2,097  | 17,214 | 6,591  |

| transporter                                                                                                       |          |     |     |     |     |       |        |        |        |
|-------------------------------------------------------------------------------------------------------------------|----------|-----|-----|-----|-----|-------|--------|--------|--------|
| hypothetical Leucine-rich repeat, typical subtype containing protein                                              | BE096686 | 0.1 | 0.4 | 0.1 | 0.1 | 494   | 792    | 652    | 632    |
| Rat neuronal olfactomedin-related ER localized protein (D2Sut1e) mRNA, complete cds                               | U03417   | 0.1 | 0.4 | 0.7 | 0.9 | 2,147 | 7,826  | 21,702 | 19,831 |
| Mouse (E25) mRNA, complete cds                                                                                    | L38971   | 0.2 | 0.5 | 0.2 | 0.1 | 916   | 2,706  | 2,303  | 1,377  |
| Mouse integral membrane protein 2A (Itm2a) gene, complete cds                                                     | AF074020 | 0.2 | 0.5 | 0.2 | 0.1 | 1,285 | 4,375  | 3,337  | 1,859  |
| Rattus norvegicus G-substrate phosphatase inhibitor mRNA, complete cds                                            | AF294688 | 0.1 | 0.3 | 0.1 | 0.1 | 752   | 3,091  | 2,133  | 1,600  |
| Incyte EST no sequence homology                                                                                   | N.A.     | 0.1 | 0.4 | 1.1 | 0.2 | 1,592 | 5,963  | 20,574 | 3,542  |
| Incyte EST                                                                                                        | N.A.     | 0.1 | 0.2 | 0.5 | 0.4 | 543   | 912    | 1,627  | 1,713  |
| Rat nerve growth factor-induced (NGFI-A) gene, complete cds                                                       | M18416   | 0.0 | 0.1 | 0.1 | 0.0 | 582   | 1,382  | 3,329  | 1,307  |
| Rattus norvegicus cDNA clone UI-R-CV0-brm-d-06-0-UI 3'                                                            | BG372104 | 0.1 | 0.3 | 1.0 | 1.2 | 633   | 1,400  | 5,673  | 5,316  |
| Incyte EST                                                                                                        | N.A.     | 0.1 | 0.2 | 0.5 | 0.1 | 481   | 724    | 1,994  | 615    |
| Rat neuropilin mRNA, complete cds                                                                                 | AF016296 | 0.1 | 0.3 | 0.8 | 0.1 | 479   | 1,002  | 2,334  | 758    |
| Mouse zinc metalloendopeptidase ADAMTS8 mRNA, complete cds                                                        | AF175282 | 0.3 | 0.8 | 0.4 | 0.9 | 445   | 564    | 555    | 665    |
| Rat E11 antigen epitope (OTS-8) mRNA, complete cds                                                                | U32115   | 0.2 | 0.6 | 0.3 | 0.2 | 782   | 1,975  | 1,586  | 1,219  |
| Rat mRNA for RB109 (brain specific protein), complete cds                                                         | D26154   | 0.4 | 0.9 | 0.7 | 0.2 | 2,216 | 5,133  | 6,734  | 2,113  |
| Mouse calcium- and diacylglycerol-regulated guanine nucleotide exchange factor I (CalDAG-GEFI) mRNA, complete cds | U78171   | 0.3 | 0.7 | 0.7 | 0.1 | 1,140 | 2,145  | 3,050  | 765    |
| Rat mRNA for collagen $\alpha$ 2 type V, partial cds                                                              | AJ224880 | 0.1 | 0.6 | 0.2 | 0.2 | 677   | 2,296  | 1,696  | 1,194  |
| Rat insulin-like growth factor binding protein 5 mRNA, 3' UTR                                                     | AF139830 | 0.2 | 0.6 | 1.7 | 0.2 | 1,299 | 4,341  | 15,354 | 2,715  |
| Mouse brain cDNA, clone MNCb-2717.                                                                                | AB041591 | 0.3 | 0.6 | 0.9 | 0.4 | 802   | 1,582  | 3,125  | 1,645  |
| Rattus norvegicus cDNA clone UI-R-CN1-cjm-g-13-0-UI 3'                                                            | BM390981 | 0.2 | 0.7 | 0.2 | 0.2 | 611   | 1,247  | 933    | 882    |
| Mouse cAMP inducible 1 protein (Ci1) mRNA, complete cds                                                           | AF121080 | 0.3 | 0.7 | 0.4 | 0.5 | 4,980 | 11,273 | 10,350 | 11,212 |
| Rattus norvegicus cDNA clone UI-R-DR0-cjc-g-03-0-UI 3'                                                            | BI303966 | 0.1 | 0.7 | 0.6 | 0.5 | 507   | 1,378  | 1,633  | 1,385  |
| Rat CDK108 mRNA                                                                                                   | Y17328   | 0.0 | 0.9 | 0.1 | 0.0 | 785   | 11,217 | 1,972  | 1,194  |
| extensin-like protein                                                                                             | CAA84230 | 0.3 | 0.9 | 0.4 | 0.3 | 1,015 | 2,857  | 2,460  | 1,954  |
| Mouse sprouty 1 (Spry1) mRNA, complete cds                                                                        | AF176903 | 0.3 | 0.9 | 0.7 | 0.7 | 585   | 998    | 1,224  | 1,309  |

|                                                                                                         |           |     |     |     |      |       |        |        |        |
|---------------------------------------------------------------------------------------------------------|-----------|-----|-----|-----|------|-------|--------|--------|--------|
| Rat purine-selective sodium/nucleoside cotransporter (rCNT2) mRNA, complete cds                         | U66723    | 0.3 | 0.8 | 0.8 | 0.2  | 1,360 | 3,681  | 5,531  | 1,299  |
| Rat differentiation-associated Na-dependent inorganic phosphate cotransporter (DNPI) mRNA, complete cds | AF271235  | 0.1 | 1.0 | 0.4 | 0.1  | 1,153 | 5,100  | 3,252  | 1,463  |
| Incyte EST                                                                                              | N.A.      | 0.5 | 1.9 | 0.4 | 0.3  | 540   | 985    | 580    | 612    |
| Mus musculus, claudin 1, clone IMAGE:3493550, mRNA                                                      | BC008536  | 0.5 | 2.0 | 0.3 | 0.4  | 498   | 781    | 555    | 560    |
| Rattus norvegicus cDNA clone UI-R-CO-jq-d-07-0-UI 3'                                                    | AI045808  | 0.3 | 2.7 | 1.4 | 0.6  | 500   | 1,353  | 1,099  | 733    |
| Rat pituitary adenylate cyclase activating polypeptide precursor protein mRNA, complete cds             | M63006    | 0.2 | 4.0 | 0.3 | 1.4  | 591   | 5,171  | 1,194  | 3,115  |
| Rattus norvegicus cDNA clone UI-R-CO-gs-c-02-0-UI 3'                                                    | AA963971  | 0.5 | 2.3 | 0.5 | 0.9  | 549   | 1,396  | 731    | 1,050  |
| Mouse RNA guanylyltransferase (Mce1) mRNA, complete cds                                                 | AF034568  | 0.6 | 2.2 | 1.6 | 2.2  | 604   | 1,297  | 1,426  | 1,824  |
| CD166 (Alcam, DM-GRASP)                                                                                 | N.A.      | 0.8 | 1.8 | 0.3 | 0.8  | 6,121 | 12,958 | 4,207  | 9,520  |
| Rat mRNA for Rab3B protein.                                                                             | Y14019    | 0.7 | 2.4 | 2.3 | 10.8 | 2,618 | 8,350  | 13,009 | 27,863 |
| Mouse chordin mRNA, complete cds                                                                        | AF096276  | 0.6 | 1.8 | 1.0 | 0.7  | 761   | 1,560  | 1,514  | 1,247  |
| Rattus norvegicus similar to HTPAP protein, mRNA, contains acid phosphatase domain                      | XM_219376 | 0.4 | 3.8 | 1.1 | 0.4  | 873   | 5,324  | 2,824  | 1,311  |
| Rat mRNA for Mx3 protein.                                                                               | X52713    | 0.7 | 2.0 | 0.5 | 1.2  | 1,765 | 5,234  | 2,262  | 4,360  |
| Rattus norvegicus cDNA clone RGIDW96                                                                    | AW916943  | 0.7 | 1.8 | 2.2 | 4.6  | 661   | 1,365  | 1,990  | 2,906  |
| Rat lipoprotein lipase mRNA, complete cds                                                               | L03294    | 0.1 | 2.0 | 0.1 | 0.0  | 819   | 7,556  | 1,170  | 704    |
| similar to AD037 protein containing RalGDS/AF-6 domain                                                  | BI293840  | 0.5 | 1.4 | 1.0 | 5.0  | 978   | 2,091  | 2,203  | 7,681  |
| immunoglobulin superfamily, member 4, IGSF4                                                             | AF434663  | 0.4 | 1.7 | 0.7 | 0.8  | 3,308 | 11,632 | 9,170  | 10,056 |
| immunoglobulin superfamily, member 4, IGSF4                                                             | AF434663  | 0.5 | 1.8 | 0.7 | 0.9  | 3,205 | 11,294 | 9,430  | 8,765  |
| Rat GicAT-S mRNA for UDP-glucuronyltransferase-S, complete cds                                          | AB010441  | 0.6 | 2.6 | 2.5 | 1.2  | 1,044 | 3,873  | 5,294  | 2,935  |
| Mouse ATP-binding cassette protein (Abca8) mRNA, partial cds                                            | AF213393  | 0.6 | 1.7 | 0.2 | 0.1  | 4,484 | 11,963 | 2,715  | 1,055  |
| Mouse mRNA for adhesion protein RA175N, complete cds                                                    | AB021967  | 0.5 | 2.0 | 0.8 | 1.3  | 1,477 | 5,146  | 3,836  | 4,948  |
| Mouse manic fringe precursor mRNA, complete cds                                                         | U94349    | 0.5 | 2.1 | 1.0 | 1.1  | 887   | 2,851  | 2,545  | 2,607  |
| similar to AD037 protein containing RalGDS/AF-6 domain                                                  | XM_232305 | 0.6 | 1.5 | 1.0 | 5.8  | 688   | 1,335  | 1,441  | 4,833  |
| Mouse neurogenic extracellular slit protein (Slit2) mRNA, partial cds                                   | AF074960  | 0.6 | 1.7 | 1.4 | 2.0  | 943   | 2,232  | 2,525  | 3,317  |
| Rat fibrillin-1 mRNA, complete cds                                                                      | AF135059  | 0.6 | 1.8 | 1.1 | 2.6  | 1,038 | 2,312  | 2,010  | 5,607  |

|                                                                                     |           |     |     |      |     |        |       |        |        |
|-------------------------------------------------------------------------------------|-----------|-----|-----|------|-----|--------|-------|--------|--------|
| Rat AMP deaminase (ampd2) gene, partial cds                                         | M38126    | 0.7 | 1.4 | 2.0  | 2.3 | 3,406  | 7,149 | 15,115 | 15,921 |
| Rat PND gene encoding atrial natriuretic factor, complete cds                       | K02062    | 0.5 | 1.8 | 14.1 | 2.9 | 992    | 2,798 | 18,650 | 6,657  |
| Mouse mRNA for Doc2 $\beta$ , complete cds                                          | D85037    | 0.4 | 1.6 | 2.0  | 3.1 | 447    | 751   | 895    | 1,149  |
| Mouse mRNA for K-glypican.                                                          | X83577    | 0.1 | 2.3 | 0.3  | 0.3 | 697    | 4,966 | 1,567  | 1,459  |
| Rat Drosophila polarity gene (frizzled) homologue mRNA, complete cds                | L02529    | 0.4 | 1.1 | 0.2  | 0.1 | 717    | 1,661 | 797    | 617    |
| Rat SOD gene, complete cds                                                          | Z24721    | 0.5 | 1.2 | 0.4  | 0.4 | 705    | 1,286 | 811    | 869    |
| Rat synaptotagmin interacting protein STIP2 mRNA, complete cds                      | AF193757  | 0.2 | 1.3 | 1.3  | 0.3 | 752    | 3,398 | 5,210  | 1,454  |
| POZ/zinc finger transcription factor ODA-8                                          | AF194030  | 0.5 | 1.1 | 1.3  | 1.3 | 1,680  | 3,780 | 6,437  | 5,794  |
| tuftelin                                                                            | AAC04577  | 0.3 | 1.6 | 0.4  | 0.2 | 616    | 1,160 | 885    | 668    |
| Mouse mRNA for entactin                                                             | X14194    | 0.1 | 2.1 | 0.3  | 0.6 | 545    | 2,745 | 982    | 1,335  |
| Rattus norvegicus chloride intracellular channel 5 (Clc5), mRNA                     | NM_053603 | 0.2 | 1.3 | 0.6  | 0.6 | 534    | 1,642 | 1,321  | 1,165  |
| Incyte EST                                                                          | N.A.      | 1.7 | 0.5 | 0.4  | 0.2 | 1,144  | 675   | 696    | 591    |
| Rat heat shock protein 22 mRNA, complete cds                                        | AF314540  | 1.8 | 0.6 | 3.2  | 2.3 | 4,843  | 2,452 | 12,889 | 9,184  |
| Incyte EST                                                                          | N.A.      | 1.9 | 0.6 | 0.5  | 0.3 | 6,122  | 2,469 | 3,005  | 1,867  |
| Sox6 (SRY-box containing gene 6)                                                    | AK044981  | 2.3 | 0.6 | 0.4  | 0.2 | 4,784  | 1,768 | 2,142  | 1,163  |
| Incyte EST                                                                          | N.A.      | 2.4 | 0.8 | 1.4  | 1.4 | 805    | 597   | 1,029  | 933    |
| DRNBTE01 Rat DRG Library Rattus norvegicus cDNA clone DRNBTE01 5'                   | BG673363  | 3.4 | 0.9 | 0.3  | 0.3 | 18,737 | 9,850 | 5,933  | 5,488  |
| Mouse erythroid differentiation related factor mRNA, complete cds                   | AF060220  | 3.2 | 0.6 | 0.8  | 1.1 | 874    | 560   | 671    | 791    |
| Rat Sprague-Dawley N-methyl-D-aspartate receptor NMDAR2C subunit mRNA, complete cds | U08259    | 0.7 | 0.1 | 0.2  | 0.3 | 3,986  | 1,262 | 2,329  | 2,687  |
| Rat mRNA for receptor activity modifying protein 1, complete cds                    | AB042887  | 1.0 | 0.4 | 0.4  | 0.4 | 5,246  | 2,735 | 4,226  | 3,906  |
| Rat regulator of G-protein signaling protein 2 mRNA, complete cds                   | AF279918  | 1.0 | 0.4 | 0.9  | 0.6 | 3,903  | 2,269 | 6,842  | 4,394  |
| Rat testis-specific histone H1t and histone H4t, complete cds                       | M28409    | 1.0 | 0.3 | 0.2  | 0.6 | 4,937  | 2,475 | 2,630  | 5,642  |
| Rat protein kinase C $\delta$ subspecies                                            | M18330    | 0.9 | 0.2 | 0.1  | 0.1 | 2,593  | 1,085 | 1,101  | 932    |
| Rat protein kinase C $\delta$ subspecies                                            | M18330    | 1.1 | 0.4 | 0.4  | 0.3 | 1,388  | 896   | 1,109  | 941    |
| Rat osteoactivin mRNA, complete cds                                                 | AF184983  | 1.0 | 0.2 | 0.4  | 0.2 | 1,566  | 839   | 1,378  | 908    |
| LOMP protein                                                                        | AAD33924  | 0.5 | 0.2 | 0.1  | 0.1 | 5,501  | 2,675 | 2,326  | 1,340  |

Genes with significant differences in expression between SN and VTA were identified by SAM (false discovery rate <1%) and sorted by hierarchical clustering. Abbreviations: CA, catecholaminergic; LC, locus coeruleus; SN, substantia nigra; VTA, ventral tegmental area.
